# Supplementary material for: SAMURAI-S: Sonic Anemometer on a MUlti-Rotor drone for Atmospheric turbulence Investigation in a Sling load configuration
Source: Copernicus journal article supplement (doi:10.5194/egusphere-2024-1548), 2024-09-25
Supplement: Supplementary file [file egusphere-2024-1548-AC3-supplement.pdf]

# Response to the Reviewers

**Title: SAMURAI-S: Sonic Anemometer on a MUlti-Rotor drone for Atmospheric turbulence Investigation in a Sling load configuration**

**Manuscript Reference Number:  
egosphere-2024-1548**

**Authors:**

Mauro Ghirardelli  
Stephan T. Kral  
Etienne Cheynet  
Joachim Reuder

Date: February 14, 2025

## Response To Reviewer #2

---

### Overall Comments

The PIF phenomenon consisting in the presence of strong induced turbulence around a drone-type UAV leads to significant issues in direct measurements of atmospheric parameters. The manuscript proposes an original way to minimize the effect of the PIF phenomenon in direct measurements by hanging a sonic anemometer under the drone as a sling load. The study is interesting, urgent, and relevant to the topic of Atmospheric Measurement Techniques. The results reported by the authors can be of great interest to AMT readers. In my opinion, the below comments can help the authors to improve significantly the quality of the manuscript.

### Response

We thank the reviewer for the positive feedback and thoughtful comments. We appreciate the recognition of the relevance and originality of our work and the suggestions provided to further improve the quality of the manuscript.

---

### Reviewer Comment

1) Pages 1 and 2, Lines 7-9 and 57. The authors write that “This research aims to assess the accuracy and reliability of the developed measurement approach.” In my opinion, the statement that “The results demonstrate that SAMURAI-S matches the data quality of conventional setups for horizontal wind measurements while slightly overestimating vertical turbulence components. This overestimation increases as the wind speed increases” does not fully correspond to the purpose and results of the work. The authors should provide quantitative data on the discrepancy between Drone Data and Mast Data as a function of the increasing wind speed.

- We thank the reviewer for this comment. Quantitative data on the discrepancies between drone-based and mast-based measurements as a function of increasing wind speed were already provided in Figures 12 and 13 of the original draft. Nevertheless, we acknowledge the reviewer’s suggestion to include more explicit metrics, and we have addressed this by adding two additional comparisons. First, we have incorporated the integral length scale, which is also relevant to the reviewer’s third question, where its inclusion is explicitly requested.

Second, we have introduced a calculation of the uncertainty in the flux measurements, following the methodology presented by [1, 2, 3]. This framework is now documented in Section 4.2 of the updated manuscript. Notably, wind speed plays a significant role in the calculation of these uncertainties, directly addressing the suggestion provided by the reviewer.

2) Page 13, Line 253, Eq. (6). This equation should be corrected as  $S_w$  into  $S_{uw}$ .

- We have corrected the equation, replacing  $S_w$  with  $S_{uw}$ , as suggested by the reviewer.

3) Pages 17 and 20, Figures 8 and 10. The sonic anemometer allows measuring actual wind speed and actual ambient temperature with high spatial and temporal resolution. The analysis of the measurement series depicted in Figures 8 and 10 should be supplemented with the correlation coefficients, the turbulence scale data, and the distance between the sonic anemometers installed on the drone and the mast. In addition, histograms of the discrepancy between Drone Data and Mast Data, as well as the Cumulative Percent, which characterize the statistics of the discrepancy between the data, should be presented. It will be interesting to readers how the measurement data differ from each other at the actual wind speed and temperature.

We agree that a comparison of the integral length scales between the mast and drone data adds value to the study, and the manuscript now includes this as a new figure in the manuscript. Additionally, we have incorporated an uncertainty analysis to further enhance the discussion.

However, providing correlation coefficients and similar statistical metrics could be misleading. Readers might, for instance, expect a correlation coefficient of 1 if the drone-mounted anemometer were perfect. However, even with a theoretically perfect sensor, the correlation coefficient would be less than one because the two sensors are not located at the same position. Moreover, this correlation coefficient strongly depends on atmospheric conditions (e.g., wind speed and atmospheric stability) and would not accurately reflect the quality of the drone-mounted sensor due to the limited spatial coherence of turbulent eddies.

After discussions with our co-authors, we do not believe that including histograms of the discrepancies or cumulative percentage statistics is necessary. While such visualisations can facilitate qualitative analysis, we argue that these discrepancies are more effectively characterised using kurtosis, skewness, standard deviation estimates, and power spectral densities, which are already included in the analysis.

4) It is desirable to provide the estimated spatial resolution so that a reader could evaluate possible applications of the reported technique.

- We sincerely appreciate the reviewer's comment and the opportunity to provide further clarification. However, we find it difficult to precisely define "estimated spatial resolution" in this context. The spatial resolution of the sonic anemometer is primarily influenced by the open-path averaging process, which in turn depends on the geometry and specific model of the instrument used.

---

## Reviewer Summary

The manuscript can be published in Atmospheric Measurement Techniques after revision with allowance made for the above comments. I believe that this will qualitatively improve both the clearness of the manuscript itself and the characteristics (accuracy, reliability, etc.) of the approach to monitoring atmospheric turbulence developed by the authors.

## References

- 
- [1] J. Forrer and M. W. Rotach. On the turbulence structure in the stable boundary layer over the greenland ice sheet. *Boundary-Layer Meteorology*, 85(1):111–136, October 1997.
  - [2] Ivana Stiperski and Mathias W. Rotach. On the measurement of turbulence over complex mountainous terrain. *Boundary-Layer Meteorology*, 159(1):97–121, April 2016.

- [3] John C. Wyngaard. On surface layer turbulence. In D. A. Haugen, editor, *Workshop on Micrometeorology*, pages 101–150. American Meteorological Society, Boston, 1973.

# SAMURAI-S: Sonic Anemometer on a Multi-Rotor drone for Atmospheric turbulence Investigation in a Sling load configuration

Mauro Ghirardelli<sup>1,3</sup>, Stephan T. Kral<sup>1,2</sup>, Etienne Cheynet<sup>1</sup>, and Joachim Reuder<sup>1,2</sup>

<sup>1</sup>Geophysical Institute and Bergen Offshore Wind Centre, University of Bergen, 5020 Bergen, Norway.

<sup>2</sup>Bjerknes Centre for Climate Research, 5020 Bergen, Norway.

<sup>3</sup>Department of Atmospheric and Cryospheric Sciences, University of Innsbruck, Innrain 52f, Innsbruck, Austria.

**Correspondence:** Mauro Ghirardelli (mauro.ghirardelli@uib.no)

**Abstract.** This study introduces the SAMURAI-S, a novel measurement system that incorporates a state-of-the-art sonic anemometer combined with a multi-rotor drone in a sling load configuration, designed to overcome the limitations of traditional mast-based observations in terms of spatial flexibility. This system enables the direct measurement of 3D wind vectors while hovering, providing a significant advantage in manoeuvrability and positional accuracy over fixed mast setups. The capabilities of the system ~~are~~were quantified through a series of 10 min to 28 min flights, conducting close comparisons of turbulence measurements at altitudes of 30 m and 60 m against data from a 60-meter tower equipped with research-grade sonic anemometers. The results demonstrate that SAMURAI-S matches the data quality of conventional setups for horizontal wind measurements while slightly overestimating vertical turbulence components. This overestimation increases ~~as the wind speed increases~~with wind speed.

## 1 Introduction

Since the 1960s, ~~mast-mast-~~ and tower-based sonic anemometry ~~has~~have been the standard for high-frequency turbulence measurements in atmospheric boundary layer (ABL) research (Foken, 2006; Mauder et al., 2021). With continuous technological development over the years, state-of-the-art sonic anemometers allow for ~~in-situ flux estimations~~in situ flux estimation (e.g., Foken et al., 2012) and for the spectral characterization (e.g., Midjijawa et al., 2021) of turbulence. However, ~~recent~~several studies in ABL meteorology and wind energy, such as Fernando and Weil (2010), Mahrt (2014), or Veers et al. (2019), highlight the limitations of those traditional tower-based measurements, emphasizing the need for more flexible approaches to address a ~~wider~~broader range of relevant ABL processes.

Some examples illustrating mast-based measurement limitations include the study of the coherence of turbulence (Cheynet et al., 2018), ~~which is a critical~~a key design parameter for modern wind turbines. For such an investigation, ~~it would be required~~to erect erecting multiple 300-meter masts close to each other would be required, which is impractical. The same holds for the detailed investigation of wind turbine wakes within a wind farm, as, e.g., explored by Porté-Agel et al. (2020), as variability in wind speed and direction make a proper positioning of masts in such dynamic conditions practically unfeasible. Other research topics that require alternative sensor carriers ~~are~~include the investigation of the wave boundary layer (Wu and Qiao, 2022),

air-sea-exchange over the ocean (Taylor et al., 2018), and air-ice-sea interactions in polar regions, e.g., over open water areas within the sea ice (Marcq and Weiss, 2012).

Airborne platforms have been used to extend the range of turbulence-related measurements. Fixed-wing uncrewed ~~aerial vehicles (UAVs)~~aircraft systems (UASs), often employing multi-hole probes (Mansour et al., 2011; Wildmann et al., 2014a, b; Båserud et al., 2016; Witte et al., 2017; Calmer et al., 2018; Alaoui-Sosse et al., 2019; Rautenberg et al., 2019), have demonstrated their capability in turbulence sampling along the flight track across larger areas. ~~The~~However, the inability to hover or move very slowly ~~is, however, restricting their ability for measurements in situations that require~~restricts their ability to measure in situations requiring stationary point measurements or localized vertical profiling.

Conversely, tethered systems equipped with sonic anemometers can provide quasi-stationary measurements and are effective in vertical profiling (Ogawa and Ohara, 1982; Hobby, 2013; Canut et al., 2016). ~~Those systems require, however, a considerable logistic~~However, those systems require considerable logistical effort and have clear operational limits ~~with respect to~~regarding wind speed and atmospheric turbulence~~that, which~~ strongly affect their controllability. Consequently, tethered systems cannot be easily deployed in remote areas and complex terrain ~~or~~ safely operated ~~close to~~near structures and buildings, ~~e.g., such as~~ in urban areas or ~~the vicinity of~~near wind turbines and wind farms.

Rotary-blade ~~UAVs~~uncrewed aerial vehicles (UAVs) offer a more suitable sensor platform for localized and stationary measurements (Abichandani et al., 2020). Recent studies have explored the use of different methods of atmospheric flow measurements, ~~by either using the drone~~using either the UAV's motion and attitude as a proxy for wind estimates (Segales et al., 2020; González-Rocha et al., 2020; Shelekhov et al., 2021; Wetz et al., 2021; Wildmann and Wetz, 2022), or by mounting ~~of~~ miniaturized sonic anemometers (Palomaki et al., 2017; Li et al., 2023) on the ~~drone~~vehicle. Both methods show limitations for turbulence investigations due to the limited sampling frequency and, for most small sonic anemometers, the inability to measure the full 3D flow. First attempts of flying research-grade sonic anemometers (Hofsäb et al., 2019; Thielicke et al., 2021) have shown promising results ~~with respect to~~concerning the measurement of the mean wind speed, but full turbulence measurement capabilities are still unproven.

One main reason is that the propeller-induced flow (PIF) by the UAV can affect and disturb the on-board flow measurements. Mounting an extension arm ~~to~~ place the wind sensor either to the front (Hofsäb et al., 2019), to the side, or above the drone (Thielicke et al., 2021) is one obvious possibility to minimize the PIF effect. ~~As any mass outside the center~~Any mass placed outside the centre of gravity of the UAV ~~system~~ will inevitably compromise flight stability and complicate flight control. ~~Thus,~~ it is necessary to thoroughly investigate and characterize the PIF for appropriate sensor placement considerations (Ghirardelli et al., 2023; Jin et al., 2024; Flem et al., 2024). The second option ~~to mitigate, which mitigates~~ the potential PIF influence on the measurements ~~without heavy impact on~~without significantly impacting flight control and stability, is ~~the deployment of~~to deploy the flow sensor as ~~a~~ sling load under the drone.

Based on the latter concept, this study introduces SAMURAI-S as a novel measurement system for airborne atmospheric research using drones. To the authors' knowledge, this represents the first attempt to deploy a research-grade sonic anemometer as a suspended payload under a UAV, in contrast to the conventional approach of mounting such instruments rigidly to the UAV structure at relatively short distances (typically on the order of decimeters to a meter), as in the studies above.

Carrying the turbulence sampling payload 18 m under a rotary-wing UAV, the sensor is ~~clearly~~-located outside any measurable PIF effect (Flem et al., 2024). The payload consists of a ~~research-grade~~-sonic anemometer, an inertial navigation system (INS), a data acquisition unit, and a mounting frame. This design aims to overcome the ~~above-mentioned limitations~~limitations mentioned above, thus providing state-of-the-art sonic anemometry data with the added benefits of mobility, hover capability, and adaptable positioning. This will enable detailed turbulence analysis in various settings, including observations close to structures and in urban environments where other methods fail.

This research aims to assess the accuracy and reliability of the developed measurement approach. The methodology involves a comparative analysis between traditional mast-mounted 3D sonic anemometers and the one suspended under the drone. Another key aspect of this study is to evaluate the applicability of a dynamic tilt and motion compensation algorithm to account for the inevitable motion of the payload caused by wind drag and the drone's movements. This algorithm utilizes ~~in-situ~~in situ velocity and attitude data linked to the movement and orientation of the anemometer recorded by the INS. It aims to convert sonic anemometer turbulence measurements obtained from a moving platform into a natural wind or streamline coordinate system, as commonly used in ABL research.

The manuscript is organized as follows: Section 2 details the design of the UAV-payload system. Section 3 introduces the algorithm developed to account for the payload motion~~and it~~. This section also outlines the data post-processing techniques employed in the experimental comparison. Section 4 describes the experimental design for ~~the~~-system validation, including the measurement site and the setup of the mast instrumentation. Section 5 compares the integral and spectral flow characteristics derived from the mast- and drone-mounted sonic anemometers. ~~This comparative study focused on various aspects of airflow, including mean flow and turbulence characteristics. Both integral and spectral flow characteristics were examined.~~ Finally, Section 6 summarizes the main findings of the study and concludes that SAMURAI-S provides a novel airborne instrument platform with a large potential for effectively measuring ambient turbulent flow with unprecedented flexibility.

## 2 The SAMURAI-S system

### 2.1 Airframe

Several important design criteria guided the selection of an appropriate airframe. Turbulence measurement with a drone-mounted sonic anemometer requires ~~the ability to lift~~lifting a payload of roughly 4 kg. This weight estimate results from the required components, i.e., a research-grade sonic anemometer, an inertial navigation system (INS), a battery, a data logger, and a mounting frame. A flight time of at least 15 min to 20 min is required ~~for gathering to collect~~ turbulent flow time series that allow robust turbulence statistics for variances and covariances, as well as spectral analysis (~~Van der Hoven, 1957~~) (Van der Hoven, 1957; Kaimal and Finnigan, 1994). Finally, to comply with European regulations for drone operations in the open category, we ~~want~~wanted to limit the UAV's maximum take-off weight (MTOW) to 25 kg, which also aids the logistical aspects of deploying the system in the field. At the same time, we considered flight safety, stability, and precision in positioning ~~to be design priorities~~, design priorities since they are crucial ~~across in~~ different real-world scenarios, ~~e.g., operation in the proximity of such as operations near~~ infrastructures, human presence, or ~~in~~-complex environments.

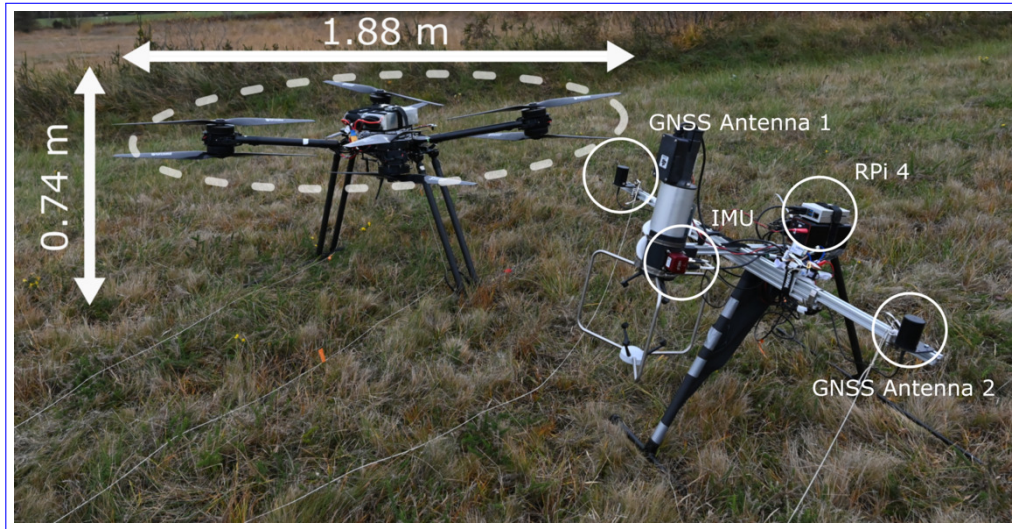

**Figure 1.** The SAMURAI-S UAS ~~including~~, showing the Foxtech D130 octocopter (left) and the sampling payload (right). The D130 is an x8-configuration UAV measuring approximately 1.9m x 0.7m. The payload features a cross-shaped aluminium frame, with a longer arm (0.9 m) supporting two Here3 GNSS antennas and a shorter arm (0.6 m) holding an RM Young 81000 ultrasonic anemometer (mounted upside down) and a Raspberry Pi 4 powered by a dedicated power bank. An IMU is positioned on the side of the anemometer. Key components of the payload are highlighted in the figure.

To address these considerations, we opted for the Foxtech D 130 (Figure 1). This UAV has a nominal maximum payload of 20 kg and a maximum flight time in hovering mode of up to 45 min without payload, depending on the atmospheric conditions. It is equipped with eight coaxial contra-rotating propellers, where four pairs of propellers, each driven by brushless electric motors, share the same rotational axis and are mounted on arms extending from the main body (x8 configuration). The configuration of the propellers provides redundancy in case of a motor failure. The UAV's frame weighs approximately 9 kg. In its default configuration, it is powered by two 6S lithium polymer (LiPo) batteries, each with a capacity of 22 A h, resulting in a take-off weight of roughly 15 kg excluding the sensor payload. The UAV ~~has an onboard autopilot unit (mounts a~~ Cubepilot Cube Orange ~~) combined with 2 GNSS~~ autopilot unit combined with two global navigation satellite system (GNSS) antennas (Here3). The inclusion of an open-source autopilot unit in the Foxtech D130's standard configuration, combined with its modular design that supports customization and easy rebuilding, ultimately led us to select this model over other alternatives available on the market.

The UAV's specifications are shown in Table 1.

## 2.2 Sensor placement

The placement of the sonic anemometer is critical for the quality of the turbulence observations, as it ~~is proven has been~~ shown that placing the sensor at a certain distance from the propellers effectively reduces the impact of the PIF (Prudden et al.,

**Table 1.** Specifications of Foxtech D130

| Components                                              | Characteristics                      |
|---------------------------------------------------------|--------------------------------------|
| UAV diameter (m) $\times$ height (m)                    | 1.88 $\times$ 0.74                   |
| UAV frame's weight (kg)                                 | 9                                    |
| Propellers                                              | Foxtech Supreme C/F 2880T            |
| Propeller diameter (m) $\times$ pitch (m)               | 0.71 m $\times$ 0.20                 |
| Propeller's weight (g)                                  | 8 $\times$ 90                        |
| Battery                                                 | 2 $\times$ 6S1P LiPo <sup>*</sup>    |
| Battery's weight (kg)                                   | 2 $\times$ 2.4                       |
| Motors                                                  | T-Motor U10II <sup>**</sup>          |
| <del>ESE</del> <u>Electronic speed controller (ESC)</u> | T-Motor Flame 80A                    |
| Autopilot                                               | Cubepilot Cube Orange <sup>***</sup> |
| GNSS                                                    | Here3 dual antenna                   |
| Flight Time (min)                                       | 40 to 45                             |

<sup>\*</sup> 22 A h; 22.2 V; 30 C

<sup>\*\*</sup> 8.6 kg maximum thrust when paired to Foxtech Supreme C/F Propeller 2880T

<sup>\*\*\*</sup> ArduCopter v4.3.6 in Aug and v4.4.3 in Dec

2016; Thielicke et al., 2021; Wilson et al., 2022). However, this approach requires ~~an estimation of~~ identifying the volume significantly affected by the PIF, which varies with the UAV's geometry (Guillermo et al., 2018; Lei and Cheng, 2020; Lei et al., 2020). Moreover, the angular momentum resulting from the additional weight mounted outside the UAV's centre of gravity could significantly compromise flight stability.

To limit the influence of the PIF on ~~the~~ velocity measurements, sensors mounted on a boom above the mean rotor plane of UAVs have been used in the past (Palomaki et al., 2017; Shimura et al., 2018; Natalie and Jacob, 2019; Thielicke et al., 2021; Wilson et al., 2022). This mounting configuration is designed to achieve an evenly balanced weight distribution around the drone by aligning the sensor's weight with the UAV's vertical axis and centre of mass. Nevertheless, this point is true primarily in low wind conditions. In scenarios with stronger winds, the drone must tilt further to counteract the increased drag, affecting the initial balance and tilt angle. Finding the right boom length that effectively reduces PIF while maintaining the drone's manoeuvrability and determining its best orientation remains a subject of ongoing research.

Previous studies (Ghirardelli et al., 2023; Jin et al., 2024), based on the Foxtech D130, suggest that the best trade-off between boom length and PIF reduction ~~;~~ while keeping the payload close to the UAV's fuselage ~~;~~ is achieved by positioning the boom upwind, with the sensor at the boom's end. This orientation avoids the areas significantly affected by the PIF as shown by Ghirardelli et al. (2023). However, to fully take advantage of this configuration, it is necessary to automatically align the sensor or UAV with the mean instantaneous wind direction, i.e. requiring an automatic flight control loop such as the "weathervaning"

algorithm recently implemented in ArduCopter v4.4.0 (see <https://ardupilot.org/copter/docs/weathervaning.html>) or through adjustments in forward flight. To the authors' knowledge, a reliable prototype of this design has yet to be developed.

125 In this study, we ~~adopt~~present a novel approach, carrying the sonic payload platform as sling load 18 m under the drone, corresponding to about 26 rotor diameters (D). This setup places the payload in a stable equilibrium state instead of mounting it above the drone. When the payload is suspended beneath the drone, it creates a pendulum, swinging around the point of minimal potential energy. This natural stability allows the payload to stabilize itself through its oscillations, reducing the need for the drone to actively counteract these movements~~actively~~. The PIF features depend more on thrust rather than UAV's geometry in the far field of the drone, i.e., in a distance of more than 5 D from the rotor plane, when the individual rotor downwash regions have merged to one, (Ghirardelli et al., 2023; Flem et al., 2024). This should extend the applicability of the payload set-up to a wider range of multi-copter platforms.

Simulations and observations were used to estimate the required vertical displacement of the wind sensor below the UAV. As detailed in Ghirardelli et al. (2023), simulations within a domain extending 9.0 m below the drone ~~;~~revealed that the ambient wind effectively carries away the downdrafts. Notably, airflow closely resembled free-flow conditions at this domain's lower boundary, directly under the drone and ~~in conditions~~ where wind speeds surpassed  $2.5 \text{ m s}^{-1}$ . This observation was further supported by Jin et al. (2024), which utilizes a configuration of three CW Doppler LIDARs to measure the PIF generated by Foxtech D130 in hover. ~~Measurements indicated~~The measurements indicated a negligible PIF distortion at a distance of 4.5 m below the Foxtech D130, in an ambient flow of  $4.0 \text{ m s}^{-1}$ . Finally, Flem et al. (2024) showed how, for the same drone model and in the absence of a background flow, the downdraft drops by more than 40 % in the range between 1.5 m to 6 m under the plane of the rotors. An additional empirical confirmation can be derived from visual observations of a multi-rotor drone over the surface of a lake in low wind conditions (Flem et al., 2024), showing that the PIF of the drone does not reach the surface with the UAV hovering at a height of 15 D above the water. To add a margin of safety, we opted to double the distance identified in the CFD simulations.

### 145 2.3 Payload Description

The payload consists of an RM Young 81000 sonic anemometer, an SBG Elipse-D inertial navigation system (INS) equipped with two GNSS antennas, and a Raspberry Pi 4 (RPi 4) microprocessor serving as a data logger (Figure 1 and Figure 2). The SBG Elipse-D is a compact INS featuring a dual-antenna GNSS receiver. It includes a MEMS-based ~~Inertial Measurement Unit~~inertial measurement unit (IMU) and uses an ~~Extended Kalman Filter~~extended Kalman filter (EKF) to fuse inertial and GNSS data. Table 2 and Table 3 provide key specifications of the sonic anemometer and the INS, respectively.

For the integration of the different sensors, the battery, and the data logger, we constructed a horizontal T-shaped aluminium frame with a 0.55 m long main bar and a 1.00 m long crossbar. In addition, we added a T-shaped support leg to better protect the sensors during landing, transport, and storage and a triangular wind vane to aid the sensor alignment with the mean wind direction and dampen lateral and rotational oscillations around the yaw axis.

155 The sonic anemometer was mounted upside down in the front of this frame, with the INS attached via a custom-fitted mounting plate to the side of its cylindrical support structure, assuring parallel alignment of both sensor coordinate systems.

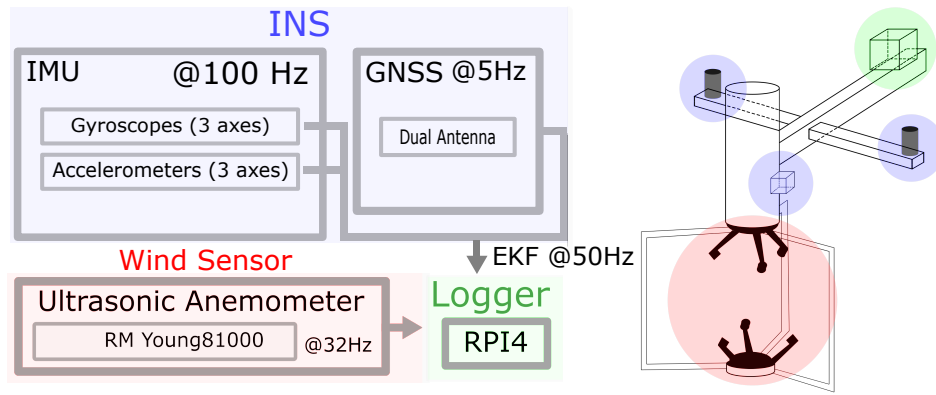

**Figure 2.** Diagram and blueprint of the measurement and acquisition system showing the how data flow from the sensors to into the logger. On the left, two main sensor outputs –INS (highlighted in blue) and the ultrasonic anemometer (highlighted in red)– are depicted as being stored and logged by the RPi 4 (highlighted in green). The diagram also indicates the sampling rates, namely 32 Hz for the ultrasonic anemometer and a 50 Hz extended Kalman filter (EKF) output from the INS, which fuses data from a 100 Hz IMU signal and 5 Hz GPS data. On the right, a schematic of the payload shows the physical placement of each component, colour-coded to match the diagram on the left.

**Table 2.** Specifications of RM Young 81000 sonic anemometer.

| Specifications                                    | RM Young 81000         |
|---------------------------------------------------|------------------------|
| Wind Speed Range ( $\text{m s}^{-1}$ )            | 0 to 40                |
| Wind Speed Resolution ( $\text{m s}^{-1}$ )       | 0.01                   |
| Wind Speed Accuracy ( $\text{m s}^{-1}$ , % RMSE) | $\pm 0.05$ , $\pm 1$ , |
| Wind Dir. Elevation Range ( $^{\circ}$ )          | $\pm 60.0$             |
| Wind Dir. Resolution ( $^{\circ}$ )               | 0.1                    |
| Wind Dir. Accuracy* ( $^{\circ}$ )                | $\pm 2$                |
| Sonic Temp. Range ( $^{\circ}\text{C}$ )          | $-50$ to $50$          |
| Sonic Temp. Resolution (K)                        | 0.01                   |
| Sonic Temp. Accuracy* (K)                         | $\pm 2$                |
| Air Sample Path (m)                               | 0.15                   |
| Output Rate (Hz)                                  | 4 to 32                |
| Weight (kg)                                       | 1.7                    |

\*  $0 \text{ m s}^{-1}$  to  $30 \text{ m s}^{-1}$  range

The crossbar of the frame served as an attachment point for two nylon ropes used to link the payload to the sides of the UAV and a 0.94 m long baseline for the two GNSS antennas mounted on the tips of the bar. The data logger and a battery were positioned at the tail of the frame.

**Table 3.** Specifications of the SBG Ellipse-D inertia navigation system with RTK aiding for airborne applications

| Specifications                       | Ellipse-D*            |
|--------------------------------------|-----------------------|
| Horizontal position accuracy         | 0.01 m                |
| Vertical position accuracy           | 0.02 m                |
| Horizontal velocity accuracy         | 0.03 ms <sup>-1</sup> |
| Vertical velocity accuracy           | 0.03 ms <sup>-1</sup> |
| Pitch and Roll accuracy              | 0.05°                 |
| Heading accuracy                     | 0.4°                  |
| Weight INS (including GNSS antennas) | 0.3 kg                |

\* data were logged using the sbgBasicLogger program (sbgECom library v3.2.4011, <https://github.com/SBG-Systems/sbgECom>)

160 The attachment points for the ropes ~~are~~were aligned with the pitch axis of both the UAV and the sling load (SL) frame. The entire payload system was balanced for the sonic anemometer's pitch by shifting the position of the crossbars~~as well as the battery and~~, the battery, and the data logger. ~~The~~According to this payload design and placement, the roll motion is directly transferred to the sonic anemometer from the drone~~in contrast to~~, whereas the yaw motion ~~, while results from a combination of the drone's dynamics and aerodynamic drag, and~~ the pitch depends ~~solely on the balance of the payload mainly on the~~payload balance. Although the drone-payload setup behaves like a compound pendulum due to the two suspension ropes attached to the same weight (the payload), it has been treated as a simple pendulum for simplicity. The natural oscillation period (T) is estimated using the formula  $T = 2\pi\sqrt{\frac{l}{g}}$ , where  $l$  is the length of the ropes, and  $g = 9.81 \text{ ms}^{-2}$  is the gravitational acceleration. This calculation yields an oscillation period of approximately 8.5 s, corresponding to a frequency of 0.12 Hz. Preliminary analysis of the sonic data, conducted before performing the motion compensation, consistently ~~reveals~~revealed a  
170 distinct peak at this frequency across all flights.

## 2.4 Flight Operation

The operation of the SAMURAI-S UAS requires a team of three: a radio control (RC) pilot, a ground control station (GCS) operator, and a payload operator. Before each flight, the UAV and the payload are positioned approximately 10 m apart. The UAV batteries are securely connected, and a telemetry and an RC link are established. The two ropes are attached to two  
175 release servos on the UAV, ensuring that they are free of entanglement with the landing gear or ground obstacles. The payload is powered on and held steady to allow proper IMU initialization and gyro calibration. Finally, the operator connects to the RPi 4 hotspot to verify data streams from the sonic anemometer and the INS, checking for stable GNSS signal and EKF solutions.

During take-off, the payload operator holds the payload steady while the RC pilot executes a vertical ascent to an altitude of approximately 10 m, ensuring that the ropes lift freely without entanglement. Once the ropes are taut, the payload operator releases the payload, and the RC pilot increases the ascent speed. From this point onward, the flight typically continues in auto-mode, following a predefined flight plan, including an algorithm to actively adjust the UAV's heading to face the wind (weathervaning).

Throughout the flight, the GCS operator monitors the system's performance and payload data as long as the WiFi connection to the RPi 4 is maintained. After completing the programmed flight plan, the RC pilot can manually or automatically trigger a return-to-launch (RTL) command. In addition, other fail-safe mechanisms, including low battery, are set to trigger an automatic RTL command based on preset conditions.

During landing, the RC pilot takes control as the UAV approaches the landing area, while the payload operator prepares to catch the payload. During the initial fast descent phase, the UAS is flown diagonally to avoid potential stability issues, such as the vortex ring state (Chenglong et al., 2015; Talaeizadeh et al., 2020). The UAV then descends slowly, with the pilot counteracting any swaying of the payload to ensure a smooth catch. Once the payload is secured, the GCS operator releases the ropes via the servos. The RC pilot then increases the distance between the UAV and the payload before initiating the final landing phase. When the UAV is landed, the payload is placed on the ground, and the data acquisition is stopped. After each flight, the data from the payload and flight controller are downloaded and quickly checked, the UAV and payload are powered off, and the batteries are recharged for future flights.

The system consistently performs excellently, showing no stability issues during the flight, take-off, or landing phases, even under strong wind conditions of up to  $15 \text{ ms}^{-1}$ .

### 3 Payload data processing workflow

This section outlines the methodological approach to convert the raw flow data sampled by the payload into the natural wind vector expressed in the standard meteorological coordinate system. One primary challenge is ~~the handling of~~ asynchronous raw sensor ~~outputs~~ expressed in different coordinate frames. In addition, it is necessary to compensate ~~the measurements~~ for the motion of the payload. The workflow herein presented addresses both points through a three-stage process: ~~first~~. First, the sonic and INS outputs ~~are~~ were filtered to remove faulty data and outliers, ~~enhancing their quality and reliability~~. Next, ~~INS and sonic output are~~ these outputs were synchronized, creating a unified temporal framework. Finally, dynamic rotational and translatory transformations ~~are~~ were applied to account for changes in the orientation of the payload and its movements, which primarily come from swinging motions during hovering. For clarity, we first introduce the reference systems ~~that~~, which describe the coordinates in which the data are collected and the rotations performed.

#### 3.1 Wind vector, coordinate frames and transformation

We ~~here~~ define two right-handed coordinate systems to describe the motion of the payload: the inertial frame and the body frame, denoted by the indices  $\mathbf{i}_n$  and  $\mathbf{b}_n$  ( $n = 1, 2, 3$ ), respectively. The inertial (or NED) frame is Earth-fixed, and its axes

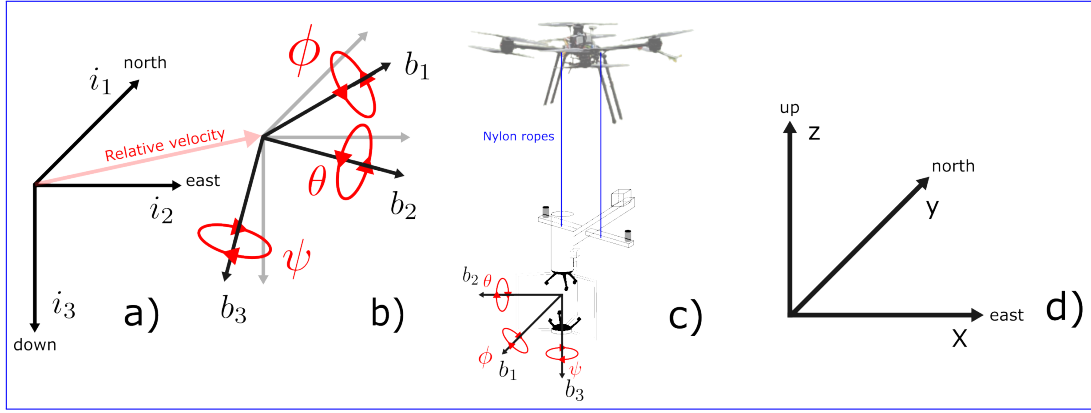

**Figure 3.** Panel (a) illustrates the inertial frame (NED), where the axes  $i_1$ ,  $i_2$ , and  $i_3$  point northward, eastward, and downward, respectively. Panel (b) depicts the body frame centred at the sonic anemometer's sampling volume, with axes  $b_1$ ,  $b_2$ , and  $b_3$  pointing forward, to the right, and downward. This panel also includes the Euler angles  $\phi$ ,  $\theta$ , and  $\psi$  depicting the orientation of the body frame relative to the inertial frame, along with the relative velocity vector  $\mathbf{V}_i^b$ . Panel (c) illustrates how the payload is attached to the drone by two nylon ropes so that the drone's motion influences the payload's body frame. This configuration causes the payload to inherit the drone's yaw ( $\psi$ ) and roll ( $\theta$ ) motions while allowing it to pitch freely. Finally, panel (d) shows the meteorological frame ~~used to represent that represents~~ the wind vector  $\mathbf{U}$ , with ~~axes~~ oriented eastward, northward, and upward axes.

- 210  $(i_1, i_2, i_3)$  are oriented northward, eastward, and downward, respectively (Figure 3a). The body frame is centred at the sonic anemometer's sampling volume and moves along with the payload. Its axes are defined based on the geometry of the payload, with  $b_1$  pointing forward,  $b_2$  to the right side, and  $b_3$  downward (e.g., Palomaki et al. 2017). Its orientation (attitude) and movements relative to the inertial frame can be described by the Euler angles and the velocity vector measured by the INS, respectively (Figure 3b).
- 215 To transform the raw flow measurements from body frame coordinates ( $\mathbf{V}_b$ ) to inertial frame coordinates ( $\mathbf{V}_i$ ), a rotation matrix  $R(\phi, \theta, \psi)$  is applied (Beard and McLain, 2012; Wetz et al., 2021). This matrix, defined by the roll, pitch, and yaw angles ( $\phi$ ,  $\theta$ , and  $\psi$ ), adjusts the raw wind vector to reflect the orientation of the payload relative to the inertial frame, ~~and~~ and is fully detailed in Appendix A. By subtracting the relative velocity vector  $\mathbf{V}_i^b$ , accounting for the movement of the body frame relative to the inertial frame, it is ~~in-addition~~ possible to eliminate any component of the velocity due to the motion
- 220 of the payload, isolating the natural wind vector in the inertial frame. The equation that accounts for both of these dynamic corrections is expressed as:

$$\mathbf{V}_i = R(\phi, \theta, \psi) \mathbf{V}_b - \mathbf{V}_i^b. \quad (1)$$

A final orthogonal rotation by right angles is ~~performed~~needed to retrieve the wind vector ( $\mathbf{U}$ ) in the standard meteorological coordinate frame, the natural wind coordinate system, with  $x$ ,  $y$ , and  $z$  pointing east, north, and up, respectively (Figure 3c).

$$\mathbf{U} = \begin{pmatrix} 0 & 1 & 0 \\ 1 & 0 & 0 \\ 0 & 0 & -1 \end{pmatrix} \mathbf{V}_i \quad (2)$$

### 3.2 Data filtering

The sonic anemometer, providing the three wind velocity components and the sonic temperature, was set to a sampling frequency of 32 Hz. Each data instance ~~is~~was timestamped according to the ~~Raspberry Pi~~RPi 4 internal clock. Since the ~~Raspberry Pi~~RPi 4 does not have a GNSS signal, the internal clock does not necessarily correspond to ~~the~~the exact UTC. Therefore, these time stamps ~~are~~were converted to  $\mu\text{s}$  from the start of the logging interval, using the first recorded timestamp as an offset. ~~In addition, the time series were adjusted to account for the upside-down mounting orientation of the sonic anemometer, ensuring that the measured vectors were appropriately rotated in the body frame coordinates before processing.~~

The raw INS output consists of 100 Hz IMU data and 5 Hz GNSS data. The IMU provides angular rates (gyroscope data) and accelerations (accelerometer data), while the GNSS supplies the local velocity, latitude, longitude, altitude, and roll and yaw angles. Furthermore, the INS outputs ~~Kalman-filtered (EKF)~~EKF data at 50 Hz, fusing inputs from both GNSS and IMU. It consists of 3D velocity data and Euler angles, both given in the NED inertial frame, as well as latitude, longitude and altitude data. Given the prototype nature of the developed system, the data processing was exclusively based on the EKF output (Table 3).

Moreover, the SBG Ellipse-D INS allows ~~to output the output of~~position, velocity and attitude data at a geometrically specified location relative to the sensor. For convenience, we thus configured the INS to output data in the body frame centred on the sonic anemometer measurement volume. Each data point from the INS ~~is~~was timestamped with the INS internal time in ns from the start of the data log and in UTC post-GNSS signal acquisition. Figure 2 shows a schematic representation of the payload system.

Before any steps in the filtering workflow, the raw time series were adjusted to account for the sonic anemometer's upside-down mounting orientation. This ensured the measured vectors were appropriately rotated in the body frame coordinates.

As an initial filter, we removed all data collected before establishing a valid and stable GNSS time. Following this, data points exceeding the measurement range of the instruments were discarded from further analysis. The filtering thresholds were determined based on the sensor specifications provided by the manufacturers. Additionally, following a despiking method adopted from Mauder et al. (2013), outliers were removed using a moving absolute deviation (MAD) filter relying on a sliding window of 10 s and a distance of  $\pm 7$  MAD from the median. ~~Missing or flagged data accounted for less than 2 % of all the collected data for each individual flight. The combined amount of missing and flagged points, following this procedure, did not exceed 2 % in any flight data set.~~ Thus, they were filled using linear interpolation. The third and final step of the filtering process consisted of identifying the time windows corresponding to the hovering state of the drone. This involved a two-step filtering approach. Initially, a filter was applied based on the median altitude  $\pm 3$  m, followed by a  $\pm 4$  m median filter on

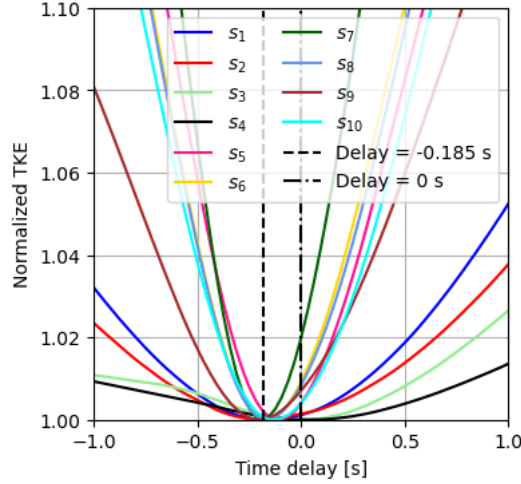

**Figure 4.** Normalized ~~Turbulent Kinetic Energy~~ turbulent kinetic energy (TKE) curves across validation flights (named  $s_1$  to  $s_{10}$ ) plotted as a function of time delay (in seconds) of the sonic anemometer output relative to the INS output. Each TKE profile is normalized by its minimum value to facilitate direct comparisons. Vertical lines at  $-0.185$  s (dashed line) and  $0$  s (dash-dot line) indicate the time window where all minimum values are located. The axes limits are set to  $-1$  to  $1$  for the x-axis and  $1$  to  $1.1$  on the y-axis to highlight subtle differences among the profiles.

255 horizontal movements to address horizontal swinging. Finally, the EKF output ~~is then was~~ downsampled to 32 Hz to match the sampling frequency of the sonic anemometer via linear interpolation.

### 3.3 Data synchronization and coordinates transformation

Ensuring accurate synchronization between the INS and the sonic anemometer outputs is crucial for correctly applying Equation (1), designed to compensate for payload motion during flight. To address potential synchronization discrepancies, we  
 260 implemented an iterative process that involves progressively changing the time lag of the sonic anemometer relative to the INS within a range of  $\pm 2$  s, with each step corresponding to  $1/32$  s. At each adjustment step, Equation (1) ~~is was~~ applied to the sonic data, and we ~~calculate~~ calculated the mean turbulent kinetic energy (TKE) from the resulting time series ~~-,~~ defined as

$$\text{TKE} = \frac{1}{2} (\sigma_u^2 + \sigma_v^2 + \sigma_w^2). \quad (3)$$

Notably, the TKE as a function of the time lag consistently shows a reverse bell shape with the minimum located between  
 265  $-0.185$  s to  $0$  s, as shown in Figure 4. Apart from the location of the time lag, this figure also indicates that potential errors associated with an imperfect time-lag correction, e.g. by a few time increments, would result in small relative errors in the computed TKE.

The time series adjusted using the time lag that minimizes the TKE ~~are-were~~ selected for further analysis. This selection ~~is-was~~ based on the assumption that the payload movement is most effectively compensated at this optimal lag. Finally, these  
270 time series ~~are-were~~ transformed into natural wind coordinates using Equation (2).

## 4 Data and methods for the validation experiment

The validation study was conducted at the Plateforme Pyrénienne d’Observations Atmosphériques (P2OA) in Lannemezan, southwestern France, during two special observation periods in August and December 2023, as part of the Model and Observa-  
tion for Surface Atmosphere Interactions (MOSAI) campaign. ~~These periods featured the deployment of~~ During these periods,  
275 the SAMURAI-S, reusable radiosondes, multiple eddy-covariance stations, meteorological masts, and various remotely piloted aircraft systems ~~including the SAMURAI-S, for a suite of measurements dedicated to studying~~ were used to study the effects of surface heterogeneities on the local wind conditions. Additionally, a tethered balloon equipped with a sonic anemometer (Canut et al., 2016) ~~provided~~ a complementary method for assessing atmospheric turbulence. While this constitutes an im-  
portant experimental dataset, the current work focuses solely on ~~the validation of~~ validating the SAMURAI-S system. Detailed  
280 analysis of the scientific data from the experimental campaign is reserved for future publications.

The P2OA observatory is located in a rural and heterogeneous area, ~~primarily characterized~~ characterized primarily by agricultural fields and forests, with a typical length scale of 500 m (e.g., BLLAST Lothon et al., 2014). The site ~~is-equipped~~ with-has a 60-meter meteorological tower ~~featuring-with~~ a triangular lattice structure (Figure 5). The ~~surrounding terrain-terrain~~ around the tower is predominantly flat and is characterized by a heterogeneous mix of grazing land, grasslands, crop fields, and  
285 forest. Within 1 km of the 60-meter tower, grasslands are more prevalent. The tower is equipped with slow-response sensors for temperature, humidity, wind speed, and direction at five levels (2 m, 15 m, 30 m, 45 m and 60 m) and eddy-covariance systems at three levels (30 m, 45 m and 60 m), of which only the lower- and uppermost system were operational during our validation period. ~~The two-Two~~ Campbell Scientific CSAT3 sonic anemometers are mounted on horizontal booms on the tower at heights of 30 m and 60 m meters above the ground (633 m and 663 m above mean sea level), with an ~~orientation-azimuth~~  
290 of 218.0° and 230.5°, respectively. These anemometers ~~are~~-operated with a sampling frequency of 10 Hz, recording the three velocity components and the sonic temperature. The validation study described herein comprises several hovering flights of SAMURAI-S at target altitudes of 30 m and 60 m ~~in-close-proximity-to-near~~ the mast.

### 4.1 Tower validation study: theoretical framework

For this validation study, we ~~employ-an-additional-coordinate-transformation-expressing-express~~ the wind vector  $\mathbf{U}$  in ~~streamlined~~  
295 ~~coordinates-with-the-a~~ coordinate system that is aligned with the mean flow streamlines (Kaimal and Finnigan, 1994). In this  
coordinate system, the three velocity components ( $u$ ,  $v$ , and  $w$ ) ~~corresponding-correspond~~ to the along-wind, cross-wind, and vertical (upward) directions, respectively (~~Kaimal and Finnigan, 1994~~). We apply Reynold decomposition, splitting each component  $i = u, v, w$  ~~in-its-into~~ a mean,  $\bar{i}$ , and a fluctuating part,  $i'$ . The fluctuating component with a zero mean is treated as a stationary, homogeneous, ergodic, and Gaussian random process. The standard deviations of the  $u$ ,  $v$ , and  $w$  components

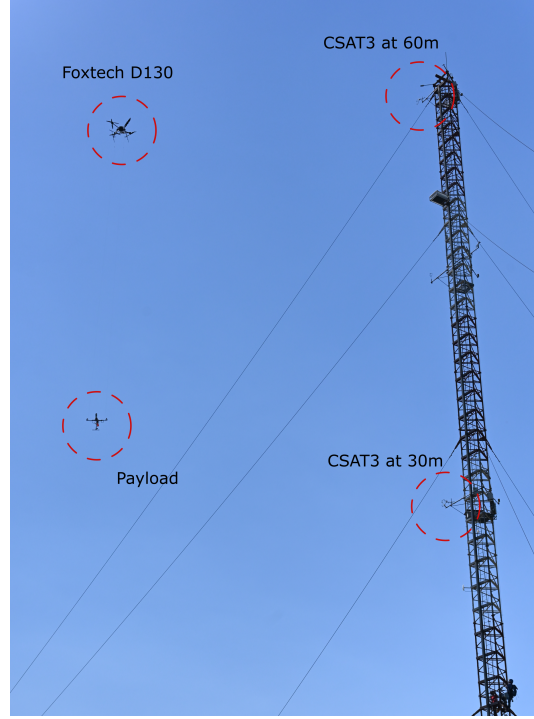

**Figure 5.** SAMURAI-S hovering side-by-side with the reference mast. The two CSAT sonic anemometers are mounted at 30 m and 60 m agl, oriented towards  $218.0^\circ$  and  $230.5^\circ$ , respectively.

are represented by  $\sigma_u$ ,  $\sigma_v$ , and  $\sigma_w$ . Additionally, the skewness and kurtosis of these components, which quantify the deviation from the assumption of Gaussian fluctuations, are denoted by  $\gamma_i$  and  $\kappa_i$ .

This study utilizes the blunt and pointed spectral models (Olesen et al., 1984; Tieleman, 1995) to examine whether the velocity spectra conform to the  $-5/3$  power law in the inertial subrange. The models are ~~expressed dimensionless as follows:-~~ a good approximation of the turbulence spectra in the atmospheric surface layer. In this study, they are expressed in their dimensionless form as

$$\frac{f S_u(f)}{u_*^2} = \frac{a_u f_r}{(1 + b_u f_r)^{5/3}} \quad (4)$$

$$\frac{f S_v(f)}{u_*^2} = \frac{a_v f_r}{(1 + b_v f_r)^{5/3}} \quad (5)$$

$$\frac{f S_w(f)}{u_*^2} = \frac{a_w f_r}{1 + b_w f_r^{5/3}} \quad (6)$$

$$\frac{\frac{f \text{Re}(S_w(f))}{u_*^2}}{\frac{f \text{Re}(S_{uw}(f))}{u_*^2}} = \frac{a_{uw} f_r}{(1 + b_{uw} f_r)^{7/3}} \quad (7)$$

310 where  $f_r = \frac{fz}{\bar{u}}$  represents the reduced frequency, while  $a_i$  and  $b_i$ , with  $i = \{u, v, w, uw\}$ , are coefficients empirically determined, and  $f_r$  is a reduced frequency defined as

$$f_r = \frac{fz}{\bar{u}}. \quad (8)$$

The Obukhov length (Foken, 2006) (Monin and Obukhov, 1954) can be calculated as

$$L = -\frac{u_*^3 \bar{\theta}_v}{g\kappa(\overline{w'\theta'_v})} \quad (9)$$

315 where  $\bar{\theta}_v$  is the mean virtual potential temperature approximated by the sonic temperature,  $\kappa = 0.40$  is the von Kármán constant, and  $\overline{w'\theta'_v}$  is the vertical kinematic flux of virtual potential temperature buoyancy flux. The nondimensional stability parameter  $\zeta$  is defined as  $\zeta = z/L$ , where  $z$  is the height above the surface.

Following Kolmogorov's hypothesis of local isotropy in the inertial subrange, the spectral ratios  $S_w/S_u$  and  $S_v/S_u$  should converge toward 4/3 as the frequency increases (Busch and Panofsky, 1968; Kaimal et al., 1972). To compare the effectiveness of the mast-mounted and drone-mounted sonic anemometers in resolving turbulence with minimal flow distortion, we apply a quadrant analysis based on the comparison of the ratio  $S_w/S_u$  between the two sensor configurations (Figure 6). In the ideal scenario, data points in this figure would cluster around the centre of the plot, as the 4/3 ratio is reached by both the drone and mast-based data. Deviations from this ratio could indicate flow distortion caused by the supporting structure, the sensor head, or both (Cheynet et al., 2019; Peña et al., 2019). A spectral ratio approaching but not reaching 4/3 may suggest that isotropy in the inertial subrange is not achieved within the investigated frequency range (Chamecki and Dias, 2004). A spectral ratio that plateaus without reaching the 4/3 law may reflect flow distortion, typically manifesting as an underestimation of the vertical velocity component. It should be noted that Kolmogorov's hypothesis of local isotropy in the inertial subrange may not apply under non-stationary conditions, e.g., in very stable atmospheric conditions with intermittent turbulence. Thus, the quadrant analysis was conducted only for samples with a mean wind speed above  $2 \text{ m s}^{-1}$ , which was sufficient in this study to eliminate samples that did not exhibit characteristics consistent with the framework adopted here to describe turbulence.

In this study, the spectral ratios are studied using a limited frequency range of interest, which is computed using the reduced frequency  $f_r = fz/\bar{u}$  (Eq. (8)), and  $f_r > 2$  following Kaimal et al. (1972). An upper boundary  $f_r < 10$  is also applied to ensure a fairer comparison between the drone and mast data.

#### 4.2 Data processing The processed data from the payload and those from mast-mounted anemometers are initially synchronized using the cross-correlation function between the horizontal Statistical uncertainties

The uncertainties associated with turbulent flux measurements are analysed using the methodology described by Wyngaard (1973); Forrer and Wyngaard (1974). This approach quantifies the random error arising from a fixed averaging period ( $\tau$ ) and the mean wind speed ( $\bar{u}$ ). Within this framework, the uncertainties in the momentum fluxes ( $a_{uw}, a_{vw}$ ), the buoyancy flux ( $a_{w\theta_v}$ ), and those associated with any

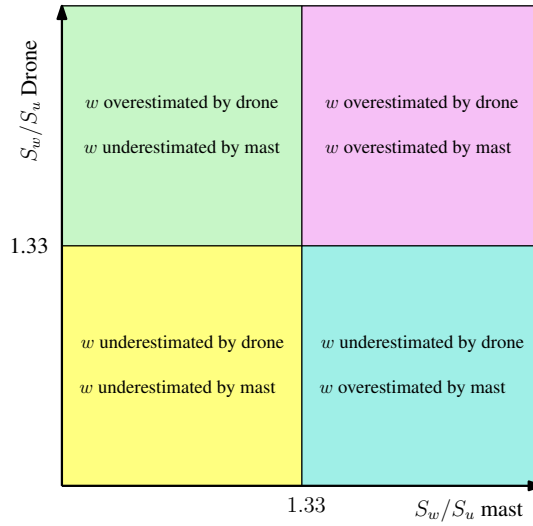

**Figure 6.** Quadrant analysis of the spectral ratios  $S_w/S_u$  to identify which sensor configuration may overestimate or underestimate the vertical velocity component. For brevity, "drone" refers to the drone-mounted sonic anemometer in this figure, and "mast" refers to the mast-mounted sonic anemometer.

turbulent variable  $\xi$  are expressed as the following non-dimensional quantities:

$$a_{uw}^2 = \frac{z}{\tau \bar{u}} \left( \frac{(\overline{u'w'})^2}{u_*^4} - 1 \right), \quad (10)$$

$$a_{vw}^2 = \frac{z}{\tau \bar{u}} \left( \frac{(\overline{v'w'})^2}{u_*^4} - 1 \right), \quad (11)$$

$$a_{\theta_v w}^2 = \frac{z}{\tau \bar{u}} \left( \frac{(\overline{w'\theta'_v})^2}{(\overline{w'\theta'_v})^2} - 1 \right), \quad (12)$$

$$a_{\xi^2}^2 = \frac{4z}{\tau \bar{u}} \left( \frac{\overline{\xi'^4}}{(\overline{\xi'^2})^2} - 1 \right). \quad (13)$$

These uncertainties reflect the assumption of ergodicity, which states that the time average converges towards the ensemble average given a sufficiently long averaging period. This assumption is at the core of the turbulence analysis with ultrasonic anemometers. Consequently, these uncertainties are inversely proportional to both the averaging time and the wind speed. Equations (10) to (12) are typically associated with greater uncertainties than Eq. (13), as the estimation of covariance requires a longer averaging period than variance estimates (Kaimal and Finnigan, 1994). The relative magnitude of uncertainties also depends on terrain roughness and stability conditions. Following the recommendations of Stiperski and Rotach (2016); Cheynet et al. (2019), uncertainties below 0.5 indicate high-quality measurements.

### 4.3 Integral length scales

The integral length scales of turbulence are one-point statistics that quantify the spatial structure of turbulent eddies. These length scales are used both in micrometeorology and wind engineering for structural design. One integral length scale can be defined per velocity component. In this study, the integral length scales were estimated in two steps. First, the integral time scale was determined by fitting an exponential function to the autocovariance function of the velocity fluctuations. ~~This aligns the time series of horizontal velocity, correcting any time lags up to 6 s through linear interpolation.~~ The autocovariance function for a given velocity component,  $\xi$ , is defined as:

$$R_{\xi\xi}(\tau) = \overline{\xi'(t)\xi'(t+\tau)}, \quad (14)$$

where  $R_{\xi\xi}(\tau)$  is the autocovariance function at lag  $\tau$ . The integral time scale,  $T_\xi$ , was then obtained by a least-square fit of an exponential function to Eq. (14)

$$R_{\xi\xi}(\tau) \approx R_{\xi\xi}(0) \exp\left(\frac{-\tau}{T_\xi}\right). \quad (15)$$

In the second step, Taylor's frozen turbulence hypothesis was applied to convert the integral time scale into the integral length scale. Taylor's hypothesis is generally valid for moderate and low turbulence intensities. Hereinafter, we define turbulence as "frozen" when the following conditions are satisfied:

$$I_u = \frac{\sigma_u}{\bar{u}} < 0.5 \quad \text{and} \quad \bar{u} > 1 \text{ m s}^{-1}. \quad (16)$$

Under these conditions, the integral length scale,  $L_\xi$ , is given by:

$$L_\xi = \bar{u}T_\xi, \quad (17)$$

### 4.4 Data processing

Data from the payload and the mast-mounted anemometers are collected at different locations. Therefore, the same turbulent structures may be detected at slightly different times due to flow advection. To address this, the two datasets are initially synchronized by an automated procedure that iteratively identifies and applies the optimal time shift (up to a maximum of 6 s) that maximizes the cross-correlation of the horizontal velocity fluctuations. The procedure then uses linear interpolation to align the time series and ensure both datasets capture the same turbulent features. Subsequently, the data are decimated by a factor of 4, and an anti-aliasing finite impulse response (FIR) filter of order 4 is applied. This leads to a sampling frequency of 8 Hz, which was adequate for properly comparing the two datasets.

Misalignments ~~could occur when mounting the sonic anemometer due to small errors in estimating the orientation of the sonic anemometers mounted~~ on the tower or ~~the relative positioning~~ between the INS and the sonic anemometer on the payload ~~can occur~~. To detect such discrepancies, the datasets from both the payload and the mast (set as the reference) are compared after retrieving the velocity components—namely  $u$ ,  $v$ , and  $w$ —using single, double, or triple rotation methods

**Table 4.** Summary of the ten samples assessed in this study.

| Sample ID | Starting Time<br>(UTC) | Duration<br>(min) | Mean wind Direction<br>(°) * | Payload height<br>(m) ** | Wind Speed<br>(m s <sup>-1</sup> ) | Stability parameter $\zeta$<br>(-) |
|-----------|------------------------|-------------------|------------------------------|--------------------------|------------------------------------|------------------------------------|
| $s_1$     | 21-Aug-2023 14:05:32   | 28.0              | 97                           | 28                       | 3.1                                | -0.46                              |
| $s_2$     | 07-Dec-2023 12:33:52   | 18.7              | 277                          | 27                       | 0.8                                | 0.38                               |
| $s_3$     | 07-Dec-2023 13:15:26   | 17.6              | 265                          | 50                       | 0.4                                | 0.32                               |
| $s_4$     | 07-Dec-2023 15:08:09   | 17.8              | 277                          | 57                       | 0.6                                | 1.25                               |
| $s_5$     | 08-Dec-2023 15:09:53   | 10.6              | 282                          | 56                       | 7.4                                | 0.07                               |
| $s_6$     | 13-Dec-2023 07:27:17   | 18.3              | 300                          | 48                       | 8.2                                | 0.2                                |
| $s_7$     | 13-Dec-2023 07:53:37   | 15.3              | 304                          | 49                       | 10.4                               | 0.1                                |
| $s_8$     | 13-Dec-2023 08:37:11   | 15.3              | 310                          | 23                       | 7.1                                | 0.20                               |
| $s_9$     | 13-Dec-2023 09:54:21   | 16.5              | 298                          | 26                       | 6.5                                | 0.01                               |
| $s_{10}$  | 13-Dec-2023 10:19:58   | 20.2              | 296                          | 49                       | 7.1                                | 0.05                               |

\* Value estimated by the mast-mounted sonic anemometer closest to the payload height during the hovering window

\*\* Average height of the drone during the hovering window.

380 (McMillen, 1988). While the single rotation aligns  $u$  with the mean wind direction, the double-rotation method involves an additional pitch rotation, ensuring  $\bar{w} = 0$ . In contrast, the triple rotation includes a third rotation around the roll axis to ensure the crosswind component of the kinematic momentum flux ( $\overline{v'w'}$ ) becomes zero. A preliminary comparison involving these three rotations showed limited differences, demonstrating the suitability of the measurement setup. Therefore, for simplicity, the double-rotation method was chosen for both the mast-mounted and the drone-mounted anemometers for further analysis.

385 Integral and spectral turbulence characteristics are studied using linearly detrended data. Auto (PSD power spectral densities (PSDs)) and cross-power spectral densities (CPSD CPSDs) of the velocity and temperature fluctuations are estimated using Welch's method (Welch, 1967). This involves segmenting the data into three parts segments with 50% overlap. An additional step includes smoothing the PSDs by bin-averaging them over 100 logarithmically-spaced bins (Kaimal and Finnigan, 1994).

## 390 5 Results and discussion

In this study, we examine a data set comprising ten samples, labelled  $s_1$  to  $s_{10}$  in Table 4, to assess turbulence measurements obtained via the drone-mounted sonic anemometer.

395 These samples were chosen from 17 initial flights, with the selection criteria based on at least 10 min of continuous, high-quality EKF output corresponding to hovering flight. Notably,  $s_2$ ,  $s_3$ , and  $s_4$  have mean flows of less than  $2 \text{ m s}^{-1}$ . The assumptions of turbulence being stationary, homogeneous, ergodic, and modelled as a Gaussian random process might not hold for these flights. For this reason, they are not subjects of making them unsuitable for the quadrant analysis, the framework

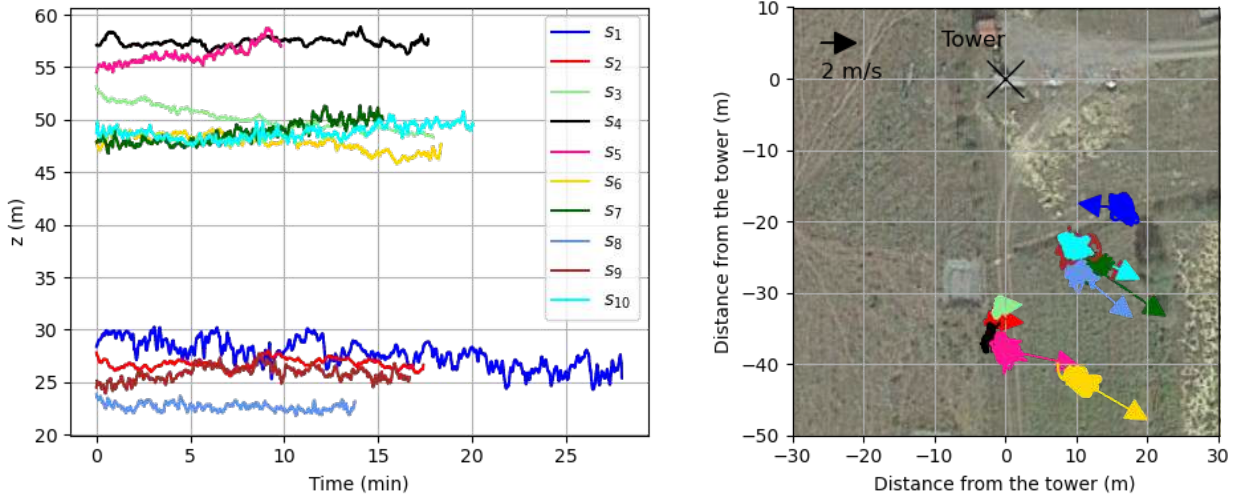

**Figure 7.** Drone altitude (left panel) and horizontal position relative to the tower (right panel) during the measurement periods of the ten validation flights. The sonic anemometers on the mast are mounted at heights of 30 m and 60 m, oriented at  $218^\circ$  and  $230.5^\circ$ , respectively. Wind directions for each flight are shown as coloured arrows, originating from the average horizontal positions. The arrow lengths correspond to a reference vector of  $2 \text{ m s}^{-1}$ . Imagery ©2024 Maxar Technologies, Map data ©2024 Google

of which is presented framework proposed in Section 4.1. Nevertheless, they are were included in the rest of the analysis for completeness. analysis for the sake of completeness.

Figure 7 shows the associated altitude of the payload above the ground (left panel) and the hovering distance from the tower during the measurement periods (right panel).

Although all flights were analyzed, for brevity, Section 5.1 features a detailed comparison of the exemplary cases from sample  $s_1$  and  $s_7$  as they exhibit markedly different characteristics. Sample  $s_1$  targeted a height of 30 m and features convective conditions ( $\zeta = -0.46$ ) with rather weak wind of  $3.1 \text{ m s}^{-1}$ . Conversely, sample  $s_7$ , which targeted 60 m, is characterized by stable stratification conditions ( $\zeta = 0.1$ ) and the highest wind speed in the series ( $10.4 \text{ m s}^{-1}$ ). It will be shown that while  $s_1$  exhibits an excellent correlation between the drone-mounted anemometer and its mast-mounted counterpart,  $s_7$  presents some discrepancies in the vertical component when comparing the two anemometers. Following these detailed examinations, we systematically compare all samples based on their integral flow characteristics in Section 5.2. Finally, we conclude the comparison by presenting flux uncertainties between the drone and mast-based datasets in Section 5.3

## 5.1 Cases of samples $s_1$ and $s_7$

This section focuses first on the second-order structure of turbulence (i.e., variances and covariances) of  $s_1$  and  $s_7$ , though the as these samples show strongly contrasting characteristics, as pointed out in the previous section. The third and fourth statistical moments (i.e., skewness and kurtosis) are also briefly discussed for completeness. Results related to temperature are presented

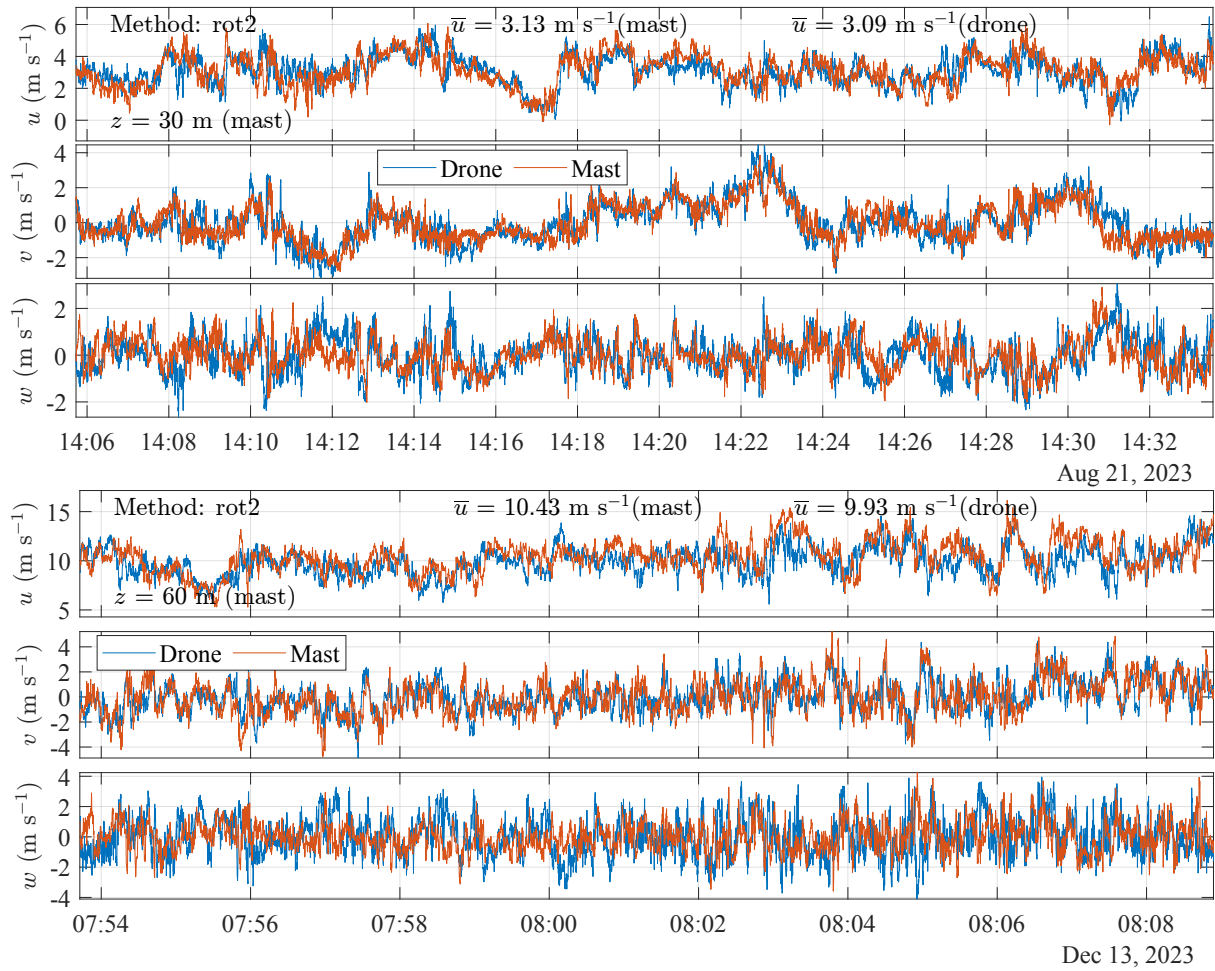

**Figure 8.** Velocity time series ~~from of~~ the wind components: streamwise ( $u$ ), crosswind ( $v$ ), and vertical ( $w$ ), from drone and mast-based set-ups during flights  $s_1$  (upper panel) and  $s_7$  (lower panel)~~where the SAMURAI-S anemometer is located near~~. The time series from the ~~sonic~~ drone and tower-based setup are coloured blue and orange, respectively. The double rotation (~~samples  $s_1$~~ Method: rot2) was applied to both the drone and tower data. The variable  $z$  corresponds to the height of the sonic ~~(sample  $s_7$ )~~ anemometer mounted on the tower, which was the one closest to the drone-mounted sonic anemometer hovering altitude. At the same time,  $\bar{u}$  denotes the average streamwise wind component calculated over the sampling period.

~~separately later in the section.~~ Figure 8 presents time series of the velocity components  $u$ ,  $v$ , and  $w$  for samples  $s_1$  and  $s_7$ . Results related to temperature are presented separately later in the section.

415 Table 5 expands ~~further~~ on this comparison by showing the statistical moments for the three velocity components between the reference mast data and the SAMURAI-S data.

~~The data exhibit a clear similarity, with no noticeable deviations~~ Flow statistics from the drone and mast-mounted sensors are in good agreement, except for the vertical velocity component  $w$  of sample  $s_7$ , where the drone-mounted sonic anemometer

**Table 5. ~~Statistical moments~~ Mean and turbulent flow statistics** for samples  $s_1$  and  $s_7$  for drone and mast ~~Data~~data. Samples  $s_1$  and  $s_7$  refer to the samples described in Table 4.  $\sigma_i$ ,  $\gamma_i$ , and  $\kappa_i$ , where  $i = u, v, w$ , refer to the standard deviation, skewness, and kurtosis estimates, respectively. The table also includes the momentum flux values ( $\overline{u'w'}$ ) and buoyancy flux ( $\overline{w'\theta_v}$ , respectively) values.

| Statistic                                                              | Sample $s_1$ |             | Sample $s_7$ |             |
|------------------------------------------------------------------------|--------------|-------------|--------------|-------------|
|                                                                        | Drone Data   | Mast Data   | Drone Data   | Mast Data   |
| $\overline{u}$ ( <del>m s<sup>-1</sup></del> <u>m s<sup>-1</sup></u> ) | 3.1          | 3.1         | 9.9          | 10.4        |
| $\sigma_u$ ( <del>m s<sup>-1</sup></del> <u>m s<sup>-1</sup></u> )     | 0.9          | 1.0         | 1.4          | 1.5         |
| $\sigma_v$ ( <del>m s<sup>-1</sup></del> <u>m s<sup>-1</sup></u> )     | 1.1          | 1.0         | 1.2          | 1.3         |
| $\sigma_w$ ( <del>m s<sup>-1</sup></del> <u>m s<sup>-1</sup></u> )     | 0.8          | 0.7         | 1.3          | 1.0         |
| $\gamma_u$                                                             | -0.2         | -0.2        | 0.0          | -0.1        |
| $\gamma_v$                                                             | 0.4          | 0.4         | 0.1          | 0.0         |
| $\gamma_w$                                                             | 0.0          | 0.3         | 0.2          | 0.3         |
| $\kappa_u$                                                             | 3.0          | 2.7         | 2.8          | 3.0         |
| $\kappa_v$                                                             | 3.4          | 2.8         | 3.2          | 3.3         |
| $\kappa_w$                                                             | 2.8          | 3.4         | 2.8          | 3.4         |
| <u><math>\overline{u'w'}</math> (m<sup>2</sup> s<sup>-2</sup>)</u>     | <u>-0.2</u>  | <u>-0.1</u> | <u>-0.7</u>  | <u>-0.5</u> |
| <u><math>\overline{w'\theta_v}</math> (K m s<sup>-1</sup>)</u>         | <u>0.1</u>   | <u>0.1</u>  | <u>-0.1</u>  | <u>0.0</u>  |

shows slightly larger fluctuations ( $\sigma_w = 1.3 \text{ m s}^{-1}$ ) than those from the mast-mounted sensor ( $\sigma_w = 1 \text{ m s}^{-1}$ ). All three velocity components in the mast and the payload data exhibit skewness and kurtosis values close to zero and three, respectively. These measurements indicate Gaussian fluctuations, typically observed ~~in~~under stationary conditions within the ABL. Despite a 11 m altitude discrepancy between the sensors (see Figure 7), the drone-mounted sensor accurately tracks short-term horizontal velocity fluctuations. The altitude difference is primarily due to the UAV's altitude control being based on pressure rather than GNSS. Unfortunately, this discrepancy was only noticed during the post-processing phase and was not corrected in the field.

Figure 9 presents the auto power spectral density (PSD) for each velocity component and the real part of the cross-spectrum between  $u$  and  $w$  for samples  $s_1$  and  $s_7$ , plotted on a log-log scale and multiplied by the frequency  $f$  to highlight spectral features. The smooth PSD is computed using ~~Equations (4) to (7)~~ Eqs. (4) to (7) that is fitted to the data recorded by the payload sensor. This least-square fit is useful to assess whether the estimated PSD follows the  $-5/3$  power law associated with the inertial subrange for the  $S_u$ ,  $S_v$ , and  $S_w$  spectra, and the  $-7/3$  power law for the co-spectrum  $\text{Re}(S_{uw})$ . A slightly steeper roll-off is observed for the mast data.

Both sensors consistently capture the along-wind ( $u$ ) and across-wind ( $v$ ) velocity components for the selected samples  $s_1$  and  $s_7$ . In sample  $s_1$ , the  $S_v$  spectrum reveals a small peak at approximately 0.20 Hz. This peak cannot be attributed to the oscillation frequencies of the payload, which are established around 0.11 Hz. Thus, it is more likely related to ~~a real-flow feature~~random fluctuations. The co-spectrum between  $u$  and  $w$  for sample  $s_1$  features unusual positive values in the mast-

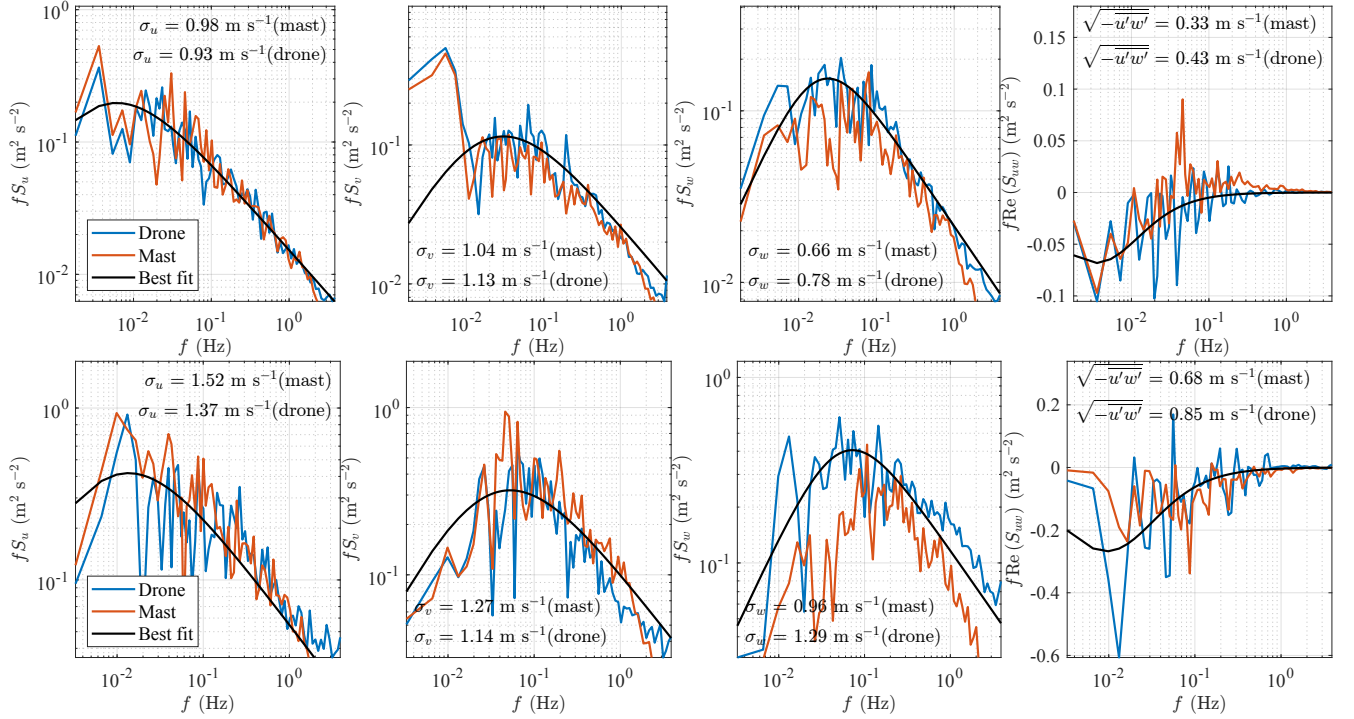

**Figure 9.** Power spectral density (PSD) estimates of the velocity components for both the flying sonic anemometer: streamwise ( $u$ ), crosswind ( $v$ ), and vertical ( $w$ ), as well as the one mounted on the mast at a height of 30 m above the ground for samples  $s_1$  (top upper panels) and the one mounted at 60 m for  $s_7$  (bottom lower panels). The solid black line refers to the blunt model (for  $S_u$ ,  $S_v$ , and  $S_{uw}$ ) or pointed model (for  $S_w$ ) fitted to the data from the drone-mounted anemometer. The variances of the velocity components ( $\sigma_u$ ,  $\sigma_v$  and  $\sigma_w$ ) and the Reynold stress element  $\overline{u'w'}$  are indicated within each corresponding plot.

435 mounted data between 0.03 Hz to 1 Hz, with a distinctive positive peak at 0.04 Hz. These features are not present in the SAMURAI-S data, indicating differences in the flow between those captured by the tower-mounted instrument. This peak is unlikely related to a shadow effect of the tower, given that the wind direction was  $97^\circ$  and the tower-mounted sonic sensor is oriented towards  $218^\circ$  for  $s_1$ .

For flight  $s_7$ , the power spectral density of the vertical component clearly shows a higher energy content at all frequencies recorded by the drone-based sonic anemometer compared to those from the tower (Figure 9). This is consistent with the higher  $\sigma_w$  values from the drone data shown in Table 5. This feature is present in nearly all flights (see Section 5.2), although it is particularly pronounced in  $s_7$ .

The comparative analysis of the sonic temperature time series reveals a good agreement across sample  $s_1$  and  $s_7$ , with minor deviations for the mean temperature likely attributable to different calibration values between the sonic anemometers (Figure 10). Further insights are provided by Figure 11, which displays the PSD estimates of the sonic temperature and the

445

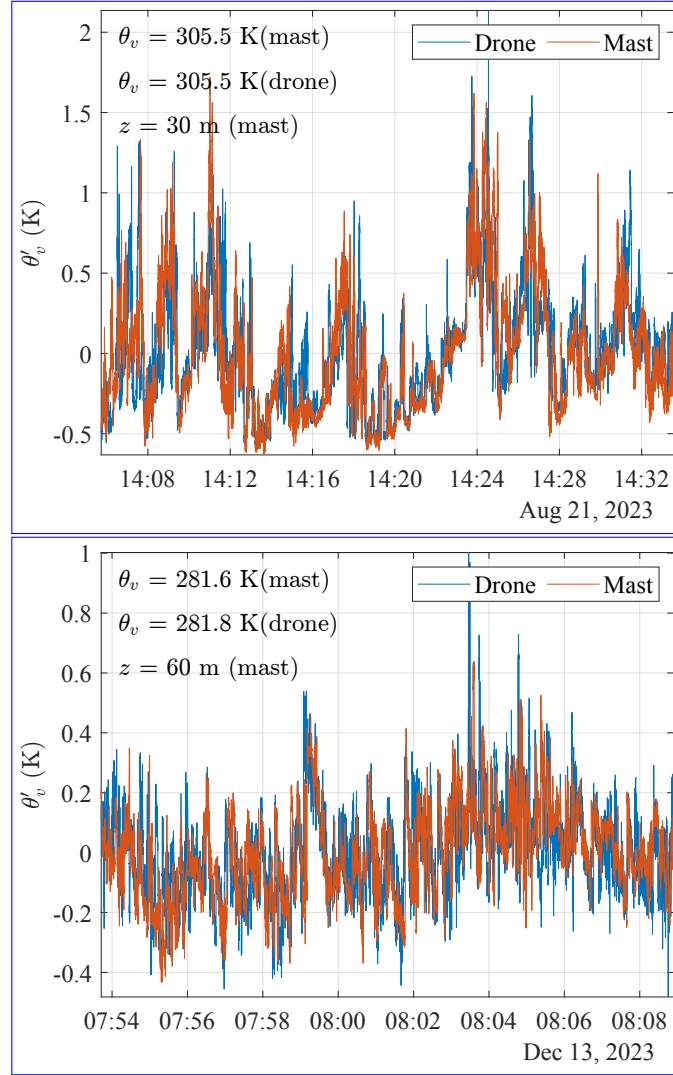

**Figure 10.** Time series of the fluctuations of the sonic temperature ( $\theta'_v$ ) for samples  $s_1$  (left panel) and  $s_7$  (right panel) measured by the drone-mounted anemometer (blue line) and the mast-mounted sonic (orange line) at a height of 30 m and 60 m above the ground, respectively. The mean sonic temperature ( $\theta_v$ ) is also indicated in each panel for both the drone and the mast measurements.

CPSD between the vertical and the along wind component with the virtual potential temperature. Notably, the PSD for sample  $s_1$  demonstrates an excellent agreement between the sonic temperature from the mast-mounted sensor and SAMURAI-S. However, for sample  $s_7$ , the PSD of the drone-based anemometer deviates from the expected  $-5/3$  power law at frequencies greater than 1 Hz. This deviation scales with frequency  $f$ , suggesting the influence of white noise on the measurement data.

450 For the mast-mounted anemometer, the PSD estimates of the temperature exhibit slight discrepancies from this  $-5/3$  power

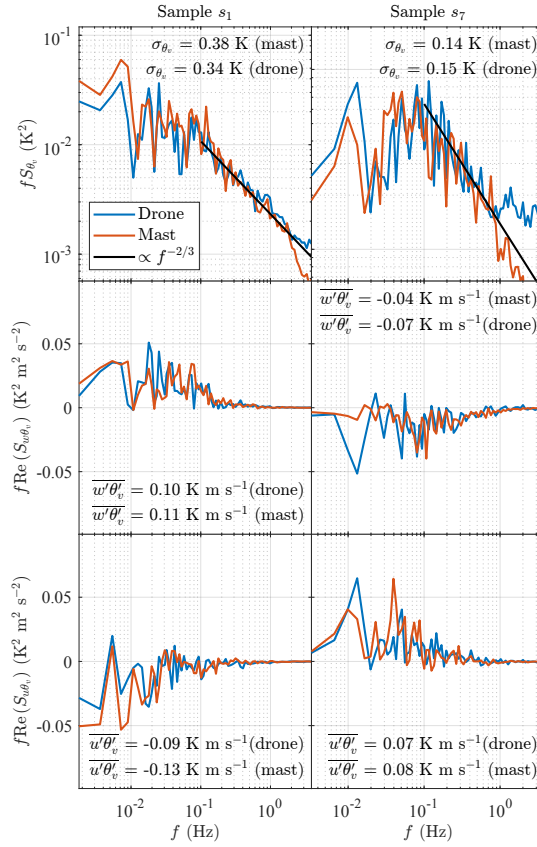

**Figure 11.** PSD estimates of the sonic temperature ~~fluctuations~~ ( $\theta_v$ ) and associated ~~CPSD with CPSDs, including~~ the vertical ( $Re(S_{w\theta_v})$ ) and ~~the along-wind along-wind~~ ( $Re(S_{u\theta_v})$ ) component for both the flying sonic anemometer (blue line) and the one mounted on the mast (orange line) 30 m above the ground for samples  $s_1$  (left panels) and at 60 m above ground for samples  $s_7$  (right panels).

law in samples  $s_1$  and  $s_7$ . ~~Additional plots showing PSD spectra for samples  $s_5, s_6, s_8, s_9$  and  $s_{10}$  are provided in Appendix B~~

~

## 5.2 Comprehensive ~~Mean and turbulence statistics~~ comparison

~~A comprehensive~~ This section presents a detailed analysis of the sensor performance ~~is conducted in this section~~, focusing on integral mean flow and turbulence characteristics for all three velocity components  $u$ ,  $v$ , and  $w$  (Figure 12 ) ~~for all ten samples. Figure 13 compares the covariance-based kinematic momentum, heat fluxes, and stability estimated from the SAMURAI-S and the mast-mounted anemometer.~~

~~and Figure 13).~~ The drone-mounted anemometer slightly underestimates the mean wind speed  $\bar{u}$  (Figure 12a), but the data scatter is low. ~~This underestimation is possibly due to differences in height, since, as it is shown in Table 4~~ The height difference ~~between the two sensors may explain this underestimation (Table 4). More specifically,~~ the payload height was on average 4 m

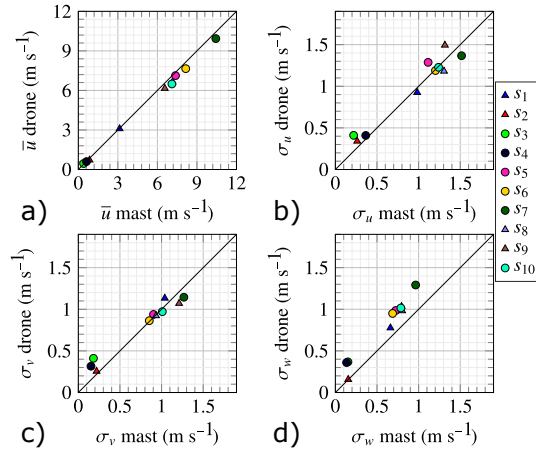

**Figure 12.** Mean wind speed and standard deviation of the three velocity components for the mast- and the drone-mounted sonic ~~anemometer~~ anemometers across the ten validation samples. Circle markers indicate measurements from the mast at 30 m above the surface, while triangle markers correspond to measurements at 60 m.

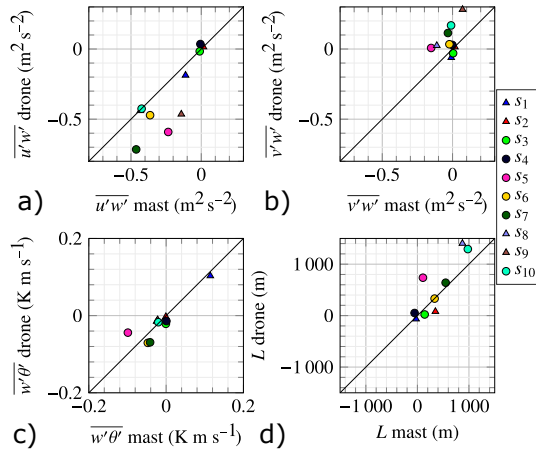

**Figure 13.** Turbulence covariance and Obukhov length for the ten validation samples, as measured by the mast- and the drone-mounted sonic ~~anemometer~~ anemometers. Circle markers represent measurements from the mast at 30 m above the surface, whereas triangle markers signify measurements at 60 m.

lower than the target altitude for the sonic at 30 m and 8.5 m for the sonic at 60 m. The standard deviations of the along-wind and across-wind velocity components denoted  $\sigma_u$  (Figure 12b) and  $\sigma_v$  (Figure 12c), respectively, show excellent agreement. The drone-mounted anemometer slightly overestimates the standard deviation  $\sigma_w$  of the vertical component (Figure 12d), and this overestimation increases nearly linearly with the mean wind speed in absolute terms.

465 The covariance estimates  $\overline{u'w'}$  (Figure 13a) exhibit a larger scatter than  $\overline{v'w'}$  (Figure 13b). ~~The covariance between sonic temperature  $\theta'$  and the fluctuating vertical component  $w'$~~  At the same time, the covariance estimate of  $\theta'w'$  (Figure 13c), and

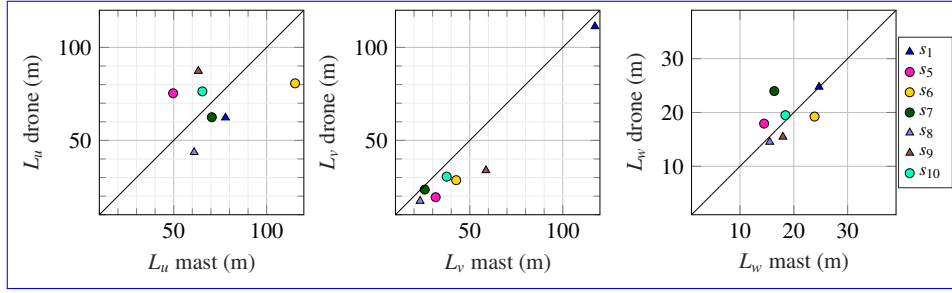

**Figure 14.** Integral turbulence length scale of the three velocity components for the mast- and the drone-mounted sonic anemometers across the ten validation samples. Circle markers indicate measurements from the mast at 30 m above the surface, while triangle markers correspond to measurements at 60 m. Only samples associated with  $I_u < 0.5$  and  $\bar{u} > 1 \text{ m s}^{-1}$  are used to satisfy the conditions required for applying Taylor's hypothesis of frozen turbulence.

the Obukhov length  $L$  (Figure 13d) demonstrate good correlation and small scatter. The vertical velocity component is used in the numerator and denominator when calculating  $L$ . Thus, the lower scatter may be attributed to the larger uncertainties associated with component  $w$  cancelling each other to some degree. Sample  $s_5$ , depicted in pink, consistently exhibits the highest scatter. This sample has the shortest duration, lasting only 10 min, which is at least 4.7 min shorter than all other samples. Thus, sample  $s_5$  may be more prone to errors associated with insufficient sampling of the largest turbulent eddies.

Figure 14 compares the integral length scales for each velocity component, estimated following the procedure presented in Section 4.3. Samples  $s_2$ ,  $s_3$ , and  $s_4$  did not satisfy the conditions required to apply Taylor's hypothesis of frozen turbulence, which were defined as a turbulence intensity of  $I_u = \sigma_u / \bar{u} < 0.5$  and a mean wind speed of  $\bar{u} > 1 \text{ m s}^{-1}$ . All other samples met these conditions, with  $I_u$  ranging from 0.15 to 0.31 and a mean wind speed exceeding  $3 \text{ m s}^{-1}$ .

The streamwise length scale  $L_u$  (Fig. 14, left panel) shows a rather large scatter around the 1:1 line. However, there is no systematic deviation between mast and drone measurements. In contrast, the middle panel suggests that the drone-mounted anemometer systematically underestimates the lateral length scale  $L_v$ . However, it is unclear whether this discrepancy arises from sensor characteristics or the specific position of the drone. The best agreement is observed in the right panel for the vertical length scale  $L_w$ , which exhibits low scatter and no clear bias, despite the overestimation of  $\sigma_w$  by the drone-mounted sonic anemometer (Fig. 12d).

The discrepancies between the vertical velocity spectral densities estimated by the mast-mounted sonic anemometers and by the drone are explored in more detail through the ratios  $S_w / S_u$  and  $S_v / S_u$ , following the method presented in Section 4.1. Chamecki and Dias (2004) states that if the spectral ratio trends towards 4/3 without actually reaching it, this could indicate that isotropy in the inertial subrange has not been achieved within the examined frequency range, a situation typically occurring in stable stratification flow under stable atmospheric conditions. In this study, the spectral ratios reached a plateau for all ten samples, albeit not always with a value of 4/3. This suggests that the atmospheric conditions were favorable to the observation of local isotropy, favourable to observing local isotropy but that flow distortion may have been present. The results for all the samples are shown in Figure 15. Values corresponding to  $s_2$ ,  $s_3$ , and  $s_4$  are displayed with grey triangle markers to highlight

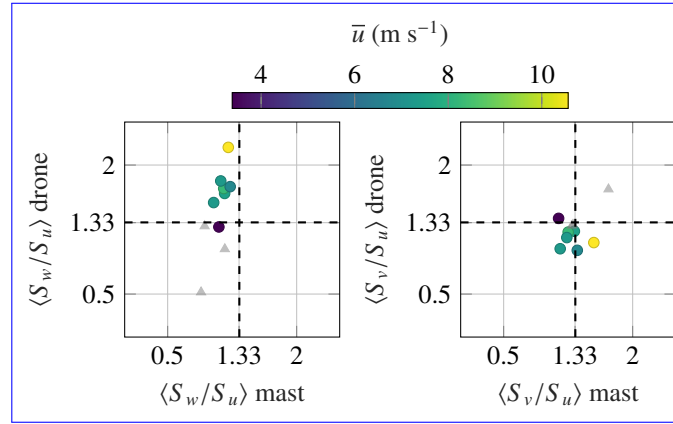

**Figure 15.** Quadrant analysis for the frequency-averaged spectral ratios  $\langle S_w/S_u \rangle$  (left panel) and  $\langle S_v/S_u \rangle$  (right panel) with  $fr > 2$  and  $fr < 10$  between the mast and drone-based measurements for different mean wind speeds. The notation  $\langle \rangle$  denotes an average over frequency bins. ~~Only samples~~ Samples with a mean wind speed ~~above  $2 \text{ m s}^{-1}$  below  $1 \text{ m s}^{-1}$~~  are ~~included~~ marked as grey triangles, as they are representative of intermittent turbulence, for which the assumption of local isotropy in the inertial subrange may not be defined.

490 their non-stationary nature, which does not fit within the analysis framework. The following discussion and comments exclude these three samples unless explicitly stated otherwise.

Figure 15 shows that ~~at lower wind speeds, SAMURAI-S may provide accurate estimations of the vertical velocity components as  $\langle S_w/S_u \rangle$  is fairly close to~~ only one sample from the drone-based dataset is close to the theoretical ratio of 1.33 for  $\bar{u} < 6 \text{ m s}^{-1}$ . As an opposite trend, SAMURAI-S overestimates this ratio as  $\langle S_w/S_u \rangle$ . As wind speed increases, the ratio  
 495 measured by SAMURAI-S diverges further from 1.33, whereas the mast data ~~display ratios fluctuates~~ display ratios fluctuates between 1.0 and 1.25. ~~While these mast data may be~~ This could be related to the bigger  $\sigma_w$  values measured by the drone setup.

Although the mast data appear closer to the expected ratio of 1.33 compared to the SAMURAI-S, they could still represent an underestimation of up to 20% of the vertical fluctuating component. As discussed above, not achieving the 4/3 ratio may hint at the presence of flow distortion caused by the mast or the sonic anemometer itself, contributing to this underestimation.

500 Similar observations apply for the ratios  $\langle S_v/S_u \rangle$ . For  $\bar{u} > 6 \text{ m s}^{-1}$ , the ratio  $\langle S_w/S_u \rangle$  exceeds the expected value of 1.33 in drone measurements.

The ~~recorded data~~ data recorded in this study mainly represent stable or near-neutral atmospheric conditions, ~~as  $\zeta$  was positive for most flights.~~ An exception is found in  $s_1$ , collected under unstable atmospheric conditions ( $\zeta = -0.46$ ) and ~~features the closest agreement~~ shows one of the closest agreements between the drone and mast-mounted sensors. It should also be noted  
 505 that for all flights except  $s_1$ , the wind consistently came from the  $280^\circ$  to  $310^\circ$  sector. The limited number of samples and the variability in stability and wind direction prevent determining whether the improved agreement under unstable conditions is a systematic effect or influenced by differences in wind direction over heterogeneous topography. Further research is necessary to determine whether convective conditions consistently enhance the performance of the drone-based setup described in this

paper or if these observations can be generalized across different turbulence intensities and atmospheric conditions. In addition,  
510 it is necessary to point out that except for  $s_1$ ,

### 5.3 Uncertainties analysis

Figure 16 presents the uncertainty metrics associated with the calculation of  $\sigma_u^2$ ,  $\sigma_v^2$ ,  $\sigma_w^2$ ,  $\overline{u'w'}$ ,  $\overline{v'w'}$ , and  $\overline{\theta'w'}$ . Most samples exhibit reasonably low uncertainties, as indicated by the green patch in Fig. 16, which corresponds to a normalised value of 0.5, consistent with that used in Stiperski and Rotach (2016); Cheynet et al. (2019). However, samples  $s_2$ ,  $s_3$ , and  $s_4$  systematically  
515 fall outside this green area due to the low wind speed at the time of recording. Consequently, they should not be included in the analysis of turbulence statistics, at least within the framework of stationary homogeneous turbulence. These samples exhibit characteristics of intermittent turbulence, the study of which is beyond the scope of this work.

In Fig. 16, the uncertainty metric  $a_{u,w}^2$  shows higher-than-expected uncertainties for samples  $s_5$  and  $s_9$ . The relatively high uncertainty for sample  $s_5$  is partly attributable to the short duration of the record—less than 10 min, which results in large  
520 uncertainties for covariance estimates. Sample  $s_9$  has a record duration of approximately 17 min, so the high uncertainty value remains unclear, notably since it is only visible in the covariance between the sonic temperature and the vertical velocity component of the wind originates from a sector of  $280^\circ$  to  $310^\circ$  for all other flights. The limited number of samples and the range of stability and wind directions prevent drawing broader conclusions concerning systematic effects drone-mounted anemometer. It should be noted that the uncertainty metrics are generally comparable between the drone-based and mast-based  
525 measurements, supporting the potential of this mobile platform for turbulence analysis.

## 6 Conclusions

This study presents a pioneering effort in atmospheric research, focusing on using a research-grade 3D sonic anemometer mounted 18 m under a drone to observe turbulence. The goal was to assess the effectiveness of drone-mounted sonic anemometers as a versatile tool for turbulence measurement, challenging traditional methods that mount the same sensor on masts or  
530 towers. A notable aspect of this research was the application of a dynamic motion compensation algorithm that accounts for the motion and tilt of the sonic anemometer while. At the same time, the drone hovered above the location of interest. This study also employed the double-rotation method for static tilt correction.

Data collection took place during the Models and Observations for Surface Atmosphere Interactions (MOSAI) campaign in France. The methodology included a comparative analysis between conventional mast-mounted 3D sonic anemometers  
535 at 30 m and 60 m above ground and the drone-mounted anemometer. This comparison focused on mean flow and turbulence characteristics, cross-covariance statistics, including the integral length scales, covariance, and auto- and cross-spectral densities of velocity fluctuations. Our findings indicate that the drone-mounted anemometer effectively captures detailed turbulence measurements. Although there is good agreement regarding the along-wind and cross-wind flow when comparing the drone and mast data, the drone-based observations consistently overestimate the fluctuations of the vertical wind vertical wind fluctuations  
540 across all flights performed. This overestimation increases as the wind speed increases, calling for further analysis under a

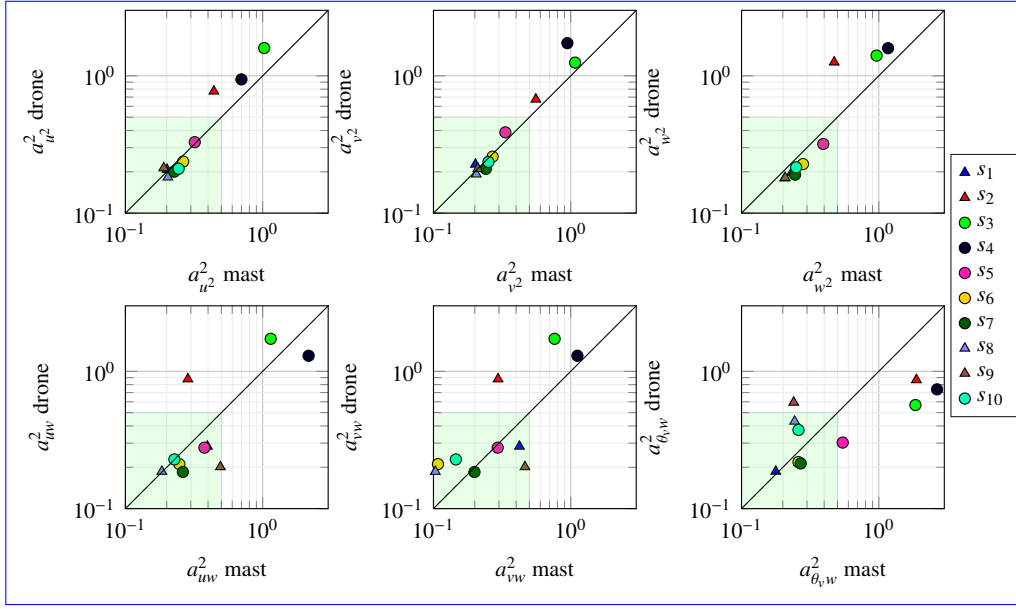

**Figure 16.** Uncertainty metrics (Eqs. (10) to (13)) estimated for the drone-mounted sensor (y-axis) and the mast-mounted sensor (x-axis). The green patch represents the region with low statistical uncertainties.

broader range of wind conditions. Also, our findings show that the drone-mounted sensor and mast-mounted sonic anemometers provide turbulence statistics with similar levels of uncertainty.

For the drone-mounted anemometer, the spectral ratio  $S_w/S_u$  was up to 63% larger than the local isotropy hypothesis predicted in the inertial subrange. However, it was also observed that the mast-mounted anemometer could significantly under-  
545 estimate the vertical turbulence component, with a spectral ratio  $S_w/S_u$  that was up to 22% lower than predicted by the local isotropy hypothesis in the inertial subrange.

The sonic temperature and the Obukhov length estimated by both sensors were also investigated. The comparison provides a positive and encouraging overall picture, with good agreement between the mast and drone measurements. The only excep-  
550 tion is the shortest sample (10 min compared to at least 15 min for all others), which exhibits markedly divergent behaviour compared to its mast-measured counterpart.

Overall, the findings underscore the ~~reliability of the drone-mounted anemometer in recording the along-wind velocity component and its potential~~ potential of the SAMURAI-S system, especially its complementarity with mast-mounted sonic anemometers and Scanning Doppler wind lidar for ~~the study of atmospheric~~ studying three-dimensional turbulence in the atmosphere.

555 *Data availability.* Data underlying the results presented in this paper can be obtained from the authors upon reasonable request.

## Appendix A: Trasformation Matrix

The transformation matrix  $R(\phi, \theta, \psi)$  is defined as

$$R(\phi, \theta, \psi) = [R_3(\phi)R_2(\theta)R_1(\psi)]^T$$

where

$$560 \quad R_1(\psi) = \begin{pmatrix} \cos \psi & \sin \psi & 0 \\ -\sin \psi & \cos \psi & 0 \\ 0 & 0 & 1 \end{pmatrix},$$

$$R_2(\theta) = \begin{pmatrix} \cos \theta & 0 & -\sin \theta \\ 0 & 1 & 0 \\ \sin \theta & 0 & \cos \theta \end{pmatrix},$$

$$R_3(\phi) = \begin{pmatrix} 1 & 0 & 0 \\ 0 & \cos \phi & \sin \phi \\ 0 & -\sin \phi & \cos \phi \end{pmatrix}.$$

## 565 Appendix B: [Power spectral density estimates for other samples](#)

[Figure B1 presents the power spectral densities of the three velocity components, as well as the cross-spectral densities between  \$u\$  and  \$w\$ , for samples  \$s\_5\$ ,  \$s\_6\$ ,  \$s\_8\$ ,  \$s\_9\$ , and  \$s\_{10}\$ , where the concept of spectral density is well-defined. For clarity, these spectral densities are normalised by the variance or covariance of the corresponding variable. Similarly, Fig. B2 displays the normalised power spectral densities of the sonic temperature, along with the normalised co-spectral densities. These figures exhibit trends](#)

570 [similar to those observed for samples  \$s\_1\$  and  \$s\_7\$ , which were analysed in detail in this study.](#)

*Author contributions.* Conceptualization was done by EC, JR, MG, and STK. The methodology was developed by EC, JR, MG, and STK. Project management was handled by JR. The experiment was conducted by JR, MG, and STK. Data analysis was performed by EC, MG, and STK. The original draft was prepared by EC, JR, MG, and STK, and the review and editing were done by EC, JR, MG, and STK.

*Competing interests.* The authors declare no conflict of interest.

575 *Disclaimer.* The authors declare that they have no known competing financial interests or personal relationships that could have appeared to influence the work reported in this paper.

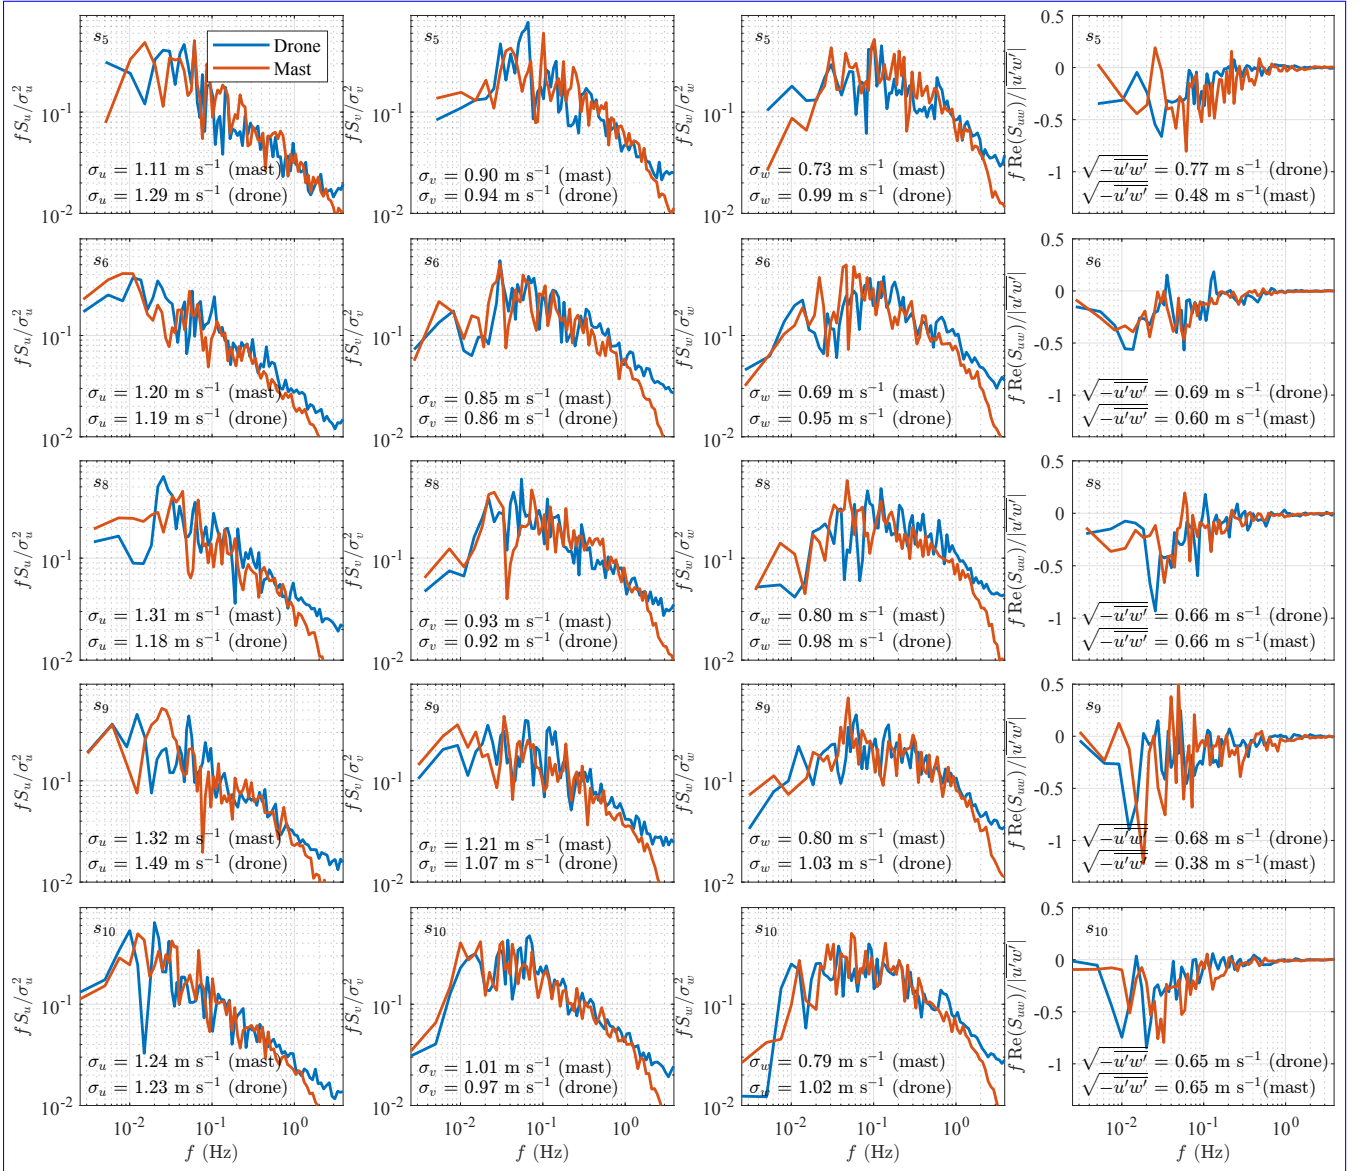

**Figure B1.** Normalised power spectral densities of the three velocity components and co-spectral densities for samples  $s_5$ ,  $s_6$ ,  $s_8$ ,  $s_9$ , and  $s_{10}$ .

*Acknowledgements.* This research is funded by the Marie Skłodowska Curie Innovation Training Network Train2Wind (H2020-MSCA-ITN-2019, Grant number 861291). The MOSAI project is funded by French ANR (Agence Nationale de la Recherche) and takes advantage of long-term measurements acquired at ACTRIS (Aerosol, Clouds and Trace Gases Research Infrastructure) and ICOS (Integrated Carbon Observation System) instrumented sites. AERIS data center is in charge of the data distribution and of the website of MOSAI project the MOSAI project website. (<https://mosai.aeris-data.fr>). We want to thank Tor Olav Kristensen for supporting the initial phase of this project.

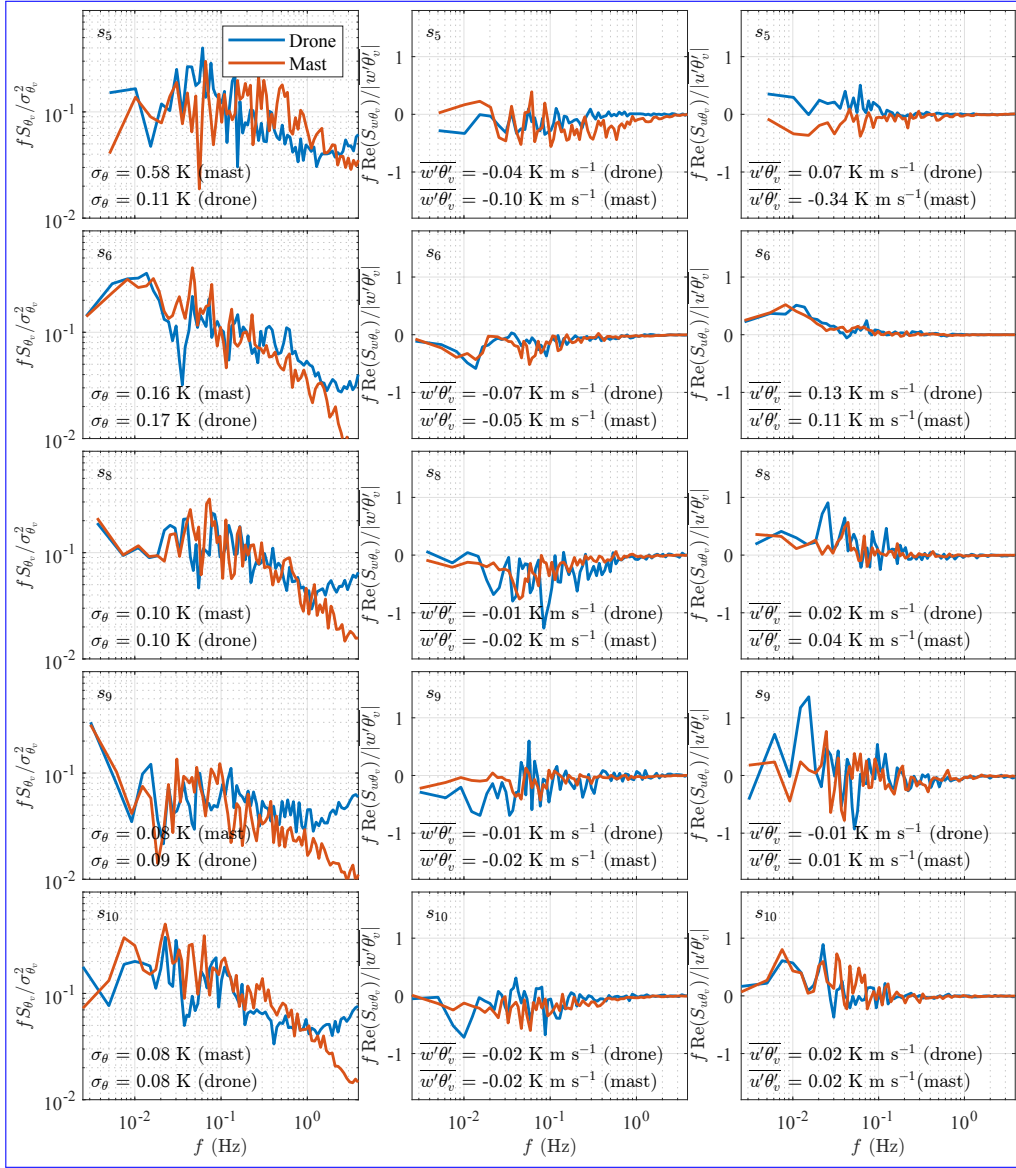

**Figure B2.** Normalised power spectral densities of the sonic temperature and associated co-spectral densities for samples  $s_5$ ,  $s_6$ ,  $s_8$ ,  $s_9$ , and  $s_{10}$ .

We also extend our sincere gratitude to everyone involved in the MOSAI campaign, whose help has been invaluable in the success of this study.

## References

- 585 Abichandani, P., Lobo, D., Ford, G., Bucci, D., and Kam, M.: Wind Measurement and Simulation Techniques in Multi-Rotor Small Unmanned Aerial Vehicles, *IEEE Access*, 8, 54 910–54 927, <https://doi.org/10.1109/ACCESS.2020.2977693>, 2020.
- Alaoui-Sosse, S., Durand, P., Medina, P., Pastor, P., Lothon, M., and Cernov, I.: OVLI-TA: An Unmanned Aerial System for Measuring Profiles and Turbulence in the Atmospheric Boundary Layer, *Sensors*, 19, 581, <http://www.mdpi.com/1424-8220/19/3/581>, 2019.
- Båserud, L., Reuder, J., Jonassen, M. O., Kral, S. T., Paskyabi, M. B., and Lothon, M.: Proof of concept for turbulence measurements with the RPAS SUMO during the BLLAST campaign, *Atmospheric Measurement Techniques*, 9, 4901–4913, <https://www.atmos-meas-tech.net/9/4901/2016/>, 2016.
- 590 Beard, R. W. and McLain, T. W.: *Small Unmanned Aircraft: Theory and Practice*, Princeton University Press, Princeton, United States, 2012.
- Busch, N. E. and Panofsky, H. A.: Recent spectra of atmospheric turbulence, *Quarterly Journal of the Royal Meteorological Society*, 94, 132–148, 1968.
- 595 Calmer, R., Roberts, G. C., Preissler, J., Sanchez, K. J., Derrien, S., O, and apos;Dowd, C.: Vertical wind velocity measurements using a five-hole probe with remotely piloted aircraft to study aerosol–cloud interactions, *Atmospheric Measurement Techniques*, 11, 2583–2599, <https://www.atmos-meas-tech.net/11/2583/2018/>, 2018.
- Canut, G., Couvreux, F., Lothon, M., Legain, D., Piguet, B., Lampert, A., Maurel, W., and Moulin, E.: Turbulence fluxes and variances measured with a sonic anemometer mounted on a tethered balloon, *Atmospheric Measurement Techniques*, 9, 4375–4386, <https://doi.org/10.5194/amt-9-4375-2016>, 2016.
- 600 Chamecki, M. and Dias, N.: The local isotropy hypothesis and the turbulent kinetic energy dissipation rate in the atmospheric surface layer, *Quarterly Journal of the Royal Meteorological Society: A journal of the atmospheric sciences, applied meteorology and physical oceanography*, 130, 2733–2752, 2004.
- Chenglong, L., Zhou, F., Jiafang, W., and Xiang, Z.: A vortex-ring-state-avoiding descending control strategy for multi-rotor UAVs, in: 2015 34th Chinese Control Conference (CCC), pp. 4465–4471, <https://doi.org/10.1109/ChiCC.2015.7260330>, 2015.
- 605 Cheynet, E., Jakobsen, J., and Reuder, J.: Velocity Spectra and Coherence Estimates in the Marine Atmospheric Boundary Layer, *Boundary-Layer Meteorology*, 169, <https://doi.org/10.1007/s10546-018-0382-2>, 2018.
- Cheyne, E., Jakobsen, J. B., and Snæbjörnsson, J.: Flow distortion recorded by sonic anemometers on a long-span bridge: Towards a better modelling of the dynamic wind load in full-scale, *Journal of Sound and Vibration*, 450, <https://doi.org/10.1016/j.jsv.2019.03.013>, 2019.
- 610 Fernando, H. and Weil, J.: Whither the stable boundary layer? A shift in the research agenda, *Bulletin of the American Meteorological Society*, 91, 1475–1484, 2010.
- Flem, A. A., Ghirardelli, M., Kral, S. T., Cheynet, E., Kristensen, T. O., and Reuder, J.: Experimental Characterization of Propeller-Induced Flow (PIF) below a Multi-Rotor UAV, *Atmosphere*, 15, <https://doi.org/10.3390/atmos15030242>, 2024.
- Foken, T.: 50 years of the Monin-Obukhov similarity theory, *Boundary-Layer Meteorology*, 119, 431–447, <https://doi.org/10.1007/s10546-006-9048-6>, 2006.
- 615 Foken, T., Aubinet, M., and Leuning, R.: *The Eddy Covariance Method*, pp. 1–19, Springer Netherlands, Dordrecht, ISBN 978-94-007-2351-1, [https://doi.org/10.1007/978-94-007-2351-1\\_1](https://doi.org/10.1007/978-94-007-2351-1_1), 2012.
- Forrer, J. and Rotach, M. W.: On the turbulence structure in the stable boundary layer over the Greenland ice sheet, *Boundary-Layer Meteorology*, 85, 111–136, <https://doi.org/10.1023/A:1000466827210>, 1997.

- Ghirardelli, M., Kral, S. T., Müller, N. C., Hann, R., Cheynet, E., and Reuder, J.: Flow Structure around a Multicopter Drone: A Computational Fluid Dynamics Analysis for Sensor Placement Considerations, *Drones*, 7, 467, <https://doi.org/10.3390/drones7070467>, 2023.
- González-Rocha, J., De Wekker, S. F. J., Ross, S. D., and Woolsey, C. A.: Wind Profiling in the Lower Atmosphere from Wind-Induced Perturbations to Multirotor UAS, *Sensors*, 20, <https://doi.org/10.3390/s20051341>, 2020.
- Guillermo, P. H., Daniel, A. V., and Eduardo, G. E.: CFD Analysis of two and four blades for multirotor Unmanned Aerial Vehicle, in: 2018 IEEE 2nd Colombian Conference on Robotics and Automation (CCRA). IEEE, pp. 1–6, 2018.
- Hobby, M. J.: Turbulence Measurements from a Tethered Balloon, Ph.D. thesis, University of Leeds, 2013.
- Hofsäß, M., Bergmann, D., Denzel, J., and Cheng, P. W.: Flying UltraSonic—A new way to measure the wind, *Wind Energy Science Discussions*, pp. 1–21, 2019.
- Jin, L., Ghirardelli, M., Mann, J., Sjöholm, M., Kral, S. T., and Reuder, J.: Rotary-wing drone-induced flow – comparison of simulations with lidar measurements, *Atmospheric Measurement Techniques*, 17, 2721–2737, <https://doi.org/10.5194/amt-17-2721-2024>, 2024.
- Kaimal, J. C. and Finnigan, J. J.: *Atmospheric Boundary Layer Flows: Their Structure and Measurement*, Oxford university press, 1994.
- Kaimal, J. C., Wyngaard, J., Izumi, Y., and Coté, O.: Spectral Characteristics of Surface-Layer Turbulence, *Quarterly Journal of the Royal Meteorological Society*, 98, 563–589, 1972.
- Lei, Y. and Cheng, M.: Aerodynamic performance of a Hex-rotor unmanned aerial vehicle with different rotor spacing, *Measurement and Control*, 53, 711–718, 2020.
- Lei, Y., Ye, Y., and Chen, Z.: Horizontal wind effect on the aerodynamic performance of coaxial Tri-Rotor MAV, *Applied Sciences*, 10, 8612, 2020.
- Li, Z., Pu, O., Pan, Y., Huang, B., Zhao, Z., and Wu, H.: A Study on Measuring the Wind Field in the Air Using a multi-rotor UAV Mounted with an Anemometer, *Boundary-Layer Meteorology*, 188, 1–27, 2023.
- Lothon, M., Lohou, F., Pino, D., Couvreur, F., Pardyjak, E. R., Reuder, J., Vilà-Guerau de Arellano, J., Durand, P., Hartogensis, O., Legain, D., Augustin, P., Gioli, B., Lenschow, D. H., Faloon, I., Yagüe, C., Alexander, D. C., Angevine, W. M., Bargain, E., Barrié, J., Bazile, E., Bezombes, Y., Blay-Carreras, E., van de Boer, A., Boichard, J. L., Bourdon, A., Butet, A., Campistron, B., de Coster, O., Cuxart, J., Dabas, A., Darbieu, C., Deboudt, K., Delbarre, H., Derrien, S., Flament, P., Fourmentin, M., Garai, A., Gibert, F., Graf, A., Groebner, J., Guichard, F., Jiménez, M. A., Jonassen, M., van den Kroonenberg, A., Magliulo, V., Martin, S., Martinez, D., Mastroiello, L., Moene, A. F., Molinos, F., Moulin, E., Pietersen, H. P., Pignatelli, B., Pique, E., Román-Cascón, C., Rufin-Soler, C., Saïd, F., Sastre-Marugán, M., Seity, Y., Steeneveld, G. J., Toscano, P., Traullé, O., Tzanos, D., Wacker, S., Wildmann, N., and Zaldei, A.: The BLLAST field experiment: Boundary-Layer Late Afternoon and Sunset Turbulence, *Atmospheric Chemistry and Physics*, 14, 10931–10960, <https://doi.org/10.5194/acp-14-10931-2014>, 2014.
- Mahrt, L.: Stably stratified atmospheric boundary layers, *Annual Review of Fluid Mechanics*, 46, 23–45, 2014.
- Mansour, M., Kocer, G., Lenherr, C., Chokani, N., and Abhari, R. S.: Seven-Sensor Fast-Response Probe for Full-Scale Wind Turbine Flowfield Measurements, *Journal of Engineering for Gas Turbines and Power*, 133, 081 601, <http://gasturbinespower.asmedigitalcollection.asme.org/article.aspx?articleid=1428610>, 2011.
- Marcq, S. and Weiss, J.: Influence of sea ice lead-width distribution on turbulent heat transfer between the ocean and the atmosphere, *The Cryosphere*, 6, 143–156, 2012.
- Mauder, M., Cuntz, M., Drüe, C., Graf, A., Rebmann, C., Schmid, H. P., Schmidt, M., and Steinbrecher, R.: A strategy for quality and uncertainty assessment of long-term eddy-covariance measurements, *Agricultural and Forest Meteorology*, 169, 122–135, <https://doi.org/10.1016/j.agrformet.2012.09.006>, 2013.

- Mauder, M., Foken, T., Aubinet, M., and Ibrom, A.: Eddy-covariance measurements, in: Springer Handbook of Atmospheric Measurements, pp. 1473–1504, Springer, 2021.
- 660 McMillen, R. T.: An eddy correlation technique with extended applicability to non-simple terrain, *Boundary-Layer Meteorology*, 43, 231–245, <https://doi.org/10.1007/BF00128405>, 1988.
- Midjiyawa, Z., Cheynet, E., Reuder, J., Ágústsson, H., and Kvamsdal, T.: Potential and challenges of wind measurements using met-masts in complex topography for bridge design: Part II – Spectral flow characteristics, *Journal of Wind Engineering and Industrial Aerodynamics*, 211, 104585, <https://doi.org/10.1016/j.jweia.2021.104585>, 2021.
- 665 Monin, A. S. and Obukhov, A. M.: Basic laws of turbulent mixing in the surface layer of the atmosphere, *Contrib. Geophys. Inst. Acad. Sci. USSR*, 151, e187, 1954.
- Natalie, V. A. and Jacob, J. D.: Experimental Observations of the Boundary Layer in Varying Topography with Unmanned Aircraft, in: AIAA Aviation 2019 Forum, American Institute of Aeronautics and Astronautics, <https://doi.org/10.2514/6.2019-3404>, 2019.
- Ogawa, Y. and Ohara, T.: Observation of the turbulent structure in the planetary boundary layer with a kytoon-mounted ultrasonic anemometer  
670 system, *Boundary-Layer Meteorology*, 22, 123–131, <https://doi.org/10.1007/BF00128060>, 1982.
- Olesen, H. R., Larsen, S. E., and Højstrup, J.: Modelling velocity spectra in the lower part of the planetary boundary layer, *Boundary-Layer Meteorology*, 29, 285–312, 1984.
- Palomaki, R. T., Rose, N. T., van den Bossche, M., Sherman, T. J., and Wekker, S. F. D.: Wind estimation in the lower atmosphere using multirotor aircraft, *Journal of Atmospheric and Oceanic Technology*, 34, 1183–1191, 2017.
- 675 Peña, A., Dellwik, E., and Mann, J.: A method to assess the accuracy of sonic anemometer measurements, *Atmospheric Measurement Techniques*, 12, 237–252, 2019.
- Porté-Agel, F., Bastankhah, M., and Shamsoddin, S.: Wind-turbine and wind-farm flows: A review, *Boundary-Layer Meteorology*, 174, 1–59, 2020.
- Prudden, S., Fisher, A., Mohamed, A., and Watkins, S.: A flying anemometer quadrotor: Part 1, 7th International Micro Air Vehicle Conference and Competition - Past, Present and Future, 2016.
- 680 Rautenberg, A., Schön, M., zum Berge, K., Mauz, M., Manz, P., Platis, A., van Kesteren, B., Suomi, I., Kral, S. T., and Bange, J.: The Multi-Purpose Airborne Sensor Carrier MASC-3 for Wind and Turbulence Measurements in the Atmospheric Boundary Layer, *Sensors*, 19, 2292, <https://doi.org/10.3390/s19102292>, 2019.
- Segales, A. R., Greene, B. R., Bell, T. M., Doyle, W., Martin, J. J., Pillar-Little, E. A., and Chilson, P. B.: The CopterSonde: an insight into  
685 the development of a smart unmanned aircraft system for atmospheric boundary layer research, *Atmospheric Measurement Techniques*, 13, 2833–2848, <https://doi.org/10.5194/amt-13-2833-2020>, 2020.
- Shelekhov, A., Afanasiev, A., Shelekhova, E., Kobzev, A., Tel'minov, A., Molchunov, A., and Poplevina, O.: Using small unmanned aerial vehicles for turbulence measurements in the atmosphere, *Izvestiya, Atmospheric and Oceanic Physics*, 57, 533–545, 2021.
- Shimura, T., Inoue, M., Tsujimoto, H., Sasaki, K., and Iguchi, M.: Estimation of Wind Vector Profile Using a Hexarotor Unmanned Aerial  
690 Vehicle and Its Application to Meteorological Observation up to 1000 m above Surface, *Journal of Atmospheric and Oceanic Technology*, 35, 1621 – 1631, <https://doi.org/10.1175/JTECH-D-17-0186.1>, 2018.
- Stiperski, I. and Rotach, M. W.: On the Measurement of Turbulence Over Complex Mountainous Terrain, *Boundary-Layer Meteorology*, 159, 97–121, <https://doi.org/10.1007/s10546-015-0103-z>, 2016.
- Talaiezhadeh, A., Antunes, D., Pishkenari, H. N., and Alasty, A.: Optimal-time quadcopter descent trajectories avoiding the vortex ring and  
695 autorotation states, *Mechatronics*, 68, 102362, <https://doi.org/10.1016/j.mechatronics.2020.102362>, 2020.

- Taylor, P. C., Hegyi, B. M., Boeke, R. C., and Boisvert, L. N.: On the Increasing Importance of Air-Sea Exchanges in a Thawing Arctic: A Review, *Atmosphere*, 9, <https://doi.org/10.3390/atmos9020041>, 2018.
- Thielicke, W., Hübert, W., Müller, U., Eggert, M., and Wilhelm, P.: Towards accurate and practical drone-based wind measurements with an ultrasonic anemometer, *Atmospheric Measurement Techniques*, 14, 1303–1318, 2021.
- 700 Tieleman, H. W.: Universality of velocity spectra, *Journal of Wind Engineering and Industrial Aerodynamics*, 56, 55–69, 1995.
- Van der Hoven, I.: Power spectrum of horizontal wind speed in the frequency range from 0.0007 to 900 cycles per hour, *Journal of Meteorology*, 14, 160–164, 1957.
- Veers, P., Dykes, K., Lantz, E., Barth, S., Bottasso, C. L., Carlson, O., Clifton, A., Green, J., Green, P., Holttinen, H., et al.: Grand challenges in the science of wind energy, *Science*, 366, eaau2027, 2019.
- 705 Welch, P.: The use of fast Fourier transform for the estimation of power spectra: a method based on time averaging over short, modified periodograms, *IEEE Transactions on Audio and Electroacoustics*, 15, 70–73, 1967.
- Wetz, T., Wildmann, N., and Beyrich, F.: Distributed wind measurements with multiple quadrotor unmanned aerial vehicles in the atmospheric boundary layer, *Atmospheric Measurement Techniques*, 14, 3795–3814, 2021.
- Wildmann, N. and Wetz, T.: Towards vertical wind and turbulent flux estimation with multicopter uncrewed aircraft systems, *Atmospheric*
- 710 *Measurement Techniques*, 15, 5465–5477, 2022.
- Wildmann, N., Hofsäb, M., Weimer, F., Joos, A., and Bange, J.: MASC – a small Remotely Piloted Aircraft (RPA) for wind energy research, *Advances in Science and Research*, 11, 55–61, <http://www.adv-sci-res.net/11/55/2014/>, 2014a.
- Wildmann, N., Ravi, S., and Bange, J.: Towards higher accuracy and better frequency response with standard multi-hole probes in turbulence measurement with remotely piloted aircraft (RPA), *Atmospheric Measurement Techniques*, 7, 1027–1041, <http://www.atmos-meas-tech.net/7/1027/2014/>, 2014b.
- 715 Wilson, T. C., Brenner, J., Morrison, Z., Jacob, J. D., and Elbing, B. R.: Wind Speed Statistics from a Small UAS and Its Sensitivity to Sensor Location, *Atmosphere*, 13, <https://www.mdpi.com/2073-4433/13/3/443>, 2022.
- Witte, B., Singler, R., and Bailey, S.: Development of an Unmanned Aerial Vehicle for the Measurement of Turbulence in the Atmospheric Boundary Layer, *Atmosphere*, 8, 195, <http://www.mdpi.com/2073-4433/8/10/195>, 2017.
- 720 Wu, L. and Qiao, F.: Wind Profile in the Wave Boundary Layer and Its Application in a Coupled Atmosphere-Wave Model, *Journal of Geophysical Research: Oceans*, 127, 1–15, <https://doi.org/10.1029/2021JC018123>, 2022.
- Wyngaard, J. C.: On Surface Layer Turbulence, in: *Workshop on Micrometeorology*, edited by Haugen, D. A., pp. 101–150, American Meteorological Society, Boston, 1973.
